1 Improved non-invasive detection of ictal and interictal epileptiform  
2 activity using Optically Pumped Magnetometers

3

4 Arjan Hillebrand<sup>a,b,c</sup>, Niall Holmes<sup>d</sup>, Ndedi Sijsma<sup>a</sup>, George C. O'Neill<sup>e</sup>, Tim M.  
5 Tierney<sup>e</sup>, Niels Liberton<sup>f</sup>, Anine H. Stam<sup>a</sup>, Nicole van Klink<sup>g</sup>, Cornelis J. Stam<sup>a,b,h</sup>,  
6 Richard Bowtell<sup>d</sup>, Matthew J. Brookes<sup>d</sup>, Gareth R. Barnes<sup>e</sup>

7

8

9 a) Amsterdam UMC location Vrije Universiteit Amsterdam, Department of Clinical  
10 Neurophysiology and Magnetoencephalography Center, Boelelaan 1117,  
11 Amsterdam, The Netherlands

12 b) Amsterdam Neuroscience, Brain Imaging, Amsterdam, The Netherlands

13 c) Amsterdam Neuroscience, Systems and Network Neurosciences, Amsterdam, The  
14 Netherlands

15 d) Sir Peter Mansfield Imaging Centre, School of Physics and Astronomy, University  
16 of Nottingham, University Park, Nottingham, NG7 2RD, UK

17 e) Wellcome Centre for Human Neuroimaging, Institute of Neurology, University  
18 College London, WC1N 3AR, UK

19 f) Amsterdam UMC location Vrije Universiteit Amsterdam, Department of Medical  
20 Technology, 3D Innovation Lab, Amsterdam, The Netherlands

21 g) UMC Utrecht Brain Center, University Medical Center Utrecht, Department of  
22 Neurology and Neurosurgery, Heidelberglaan 100, 3584 CX Utrecht, The  
23 Netherlands

24 h) Amsterdam Neuroscience, Neurodegeneration, Amsterdam, The Netherlands

25

26 Corresponding author: [a.hillebrand@amsterdamumc.nl](mailto:a.hillebrand@amsterdamumc.nl)

27

28

29

30

### Abstract

31 Magneto- and Electroencephalography (MEG/EEG) are important techniques for the  
32 diagnosis and pre-surgical evaluation of epilepsy. Yet, in current cryogen-based MEG  
33 systems the sensors are offset from the scalp, which limits the signal-to-noise ratio  
34 (SNR) and thereby the sensitivity to activity from deep structures such as the  
35 hippocampus. This effect is amplified in children, for whom adult-sized fixed-helmet  
36 systems are typically too big. Moreover, ictal recordings with fixed-helmet systems are  
37 problematic because of limited movement tolerance. Optically Pumped Magnetometers  
38 (OPMs) can be placed directly on the scalp, thereby improving SNR and consequently  
39 the sensitivity to, and localisation accuracy of, epileptiform activity. In addition,  
40 recording during seizures becomes feasible with these wearable sensors.

41 We aimed to demonstrate these advantages of OPMs in a clinical population.

42 Three adults with known weak sources of interictal epileptiform discharges (IEDs),

43 along with three children with focal epilepsy and one adult with frequent seizures

NOTE: This preprint reports new research that has not been certified by peer review and should not be used to guide clinical practice.

44 underwent MEG recordings using a 12-channel OPM-system and a 306-channel  
45 cryogen-based whole-head system. Performance of the two systems was compared in  
46 terms of IED-rate and SNR.

47 In one patient the OPMs detected IEDs that were not found with the SQUID-  
48 system. In one patient the spike yield was higher for the OPM data (9.00 versus 6.76),  
49 with negligible difference in SNR compared to the SQUID data (3.85 versus 3.93;  $U =$   
50  $-2.86$ ,  $d = -0.14$ ). This was also the case for a patient with a spike yield that was  
51 comparable to that for the SQUID data (after accounting for unilateral coverage with  
52 the OPMs; SNR 4.47 versus 4.57;  $U = -3.81$ ,  $d = -0.14$ ). For one patient the spike yield  
53 (11.03 versus 24.50) and SNR (4.39 versus 4.05;  $U = 9.53$ ,  $d = -0.36$ ) were both lower  
54 for the OPMs. In two patients no IEDs were found with either system. Importantly, the  
55 wearability of OPMs enabled the recording of seizure activity in a patient with  
56 hyperkinetic movements during the seizure. The observed ictal onset and semiology  
57 were in agreement with previous video- and stereo-EEG recordings.

58 Overall, OPM data were very much comparable to those obtained with a  
59 cryogenic system: OPMs outperformed SQUIDs for two of the four patients with IEDs,  
60 with either a higher spike yield, or an ability to detect IEDs that were not observable in  
61 the SQUID data. For three patients the SNRs of IEDs were (slightly) lower in the OPM  
62 data than in the SQUID data, but with negligible effect sizes for two of these patients.  
63 The relatively cheap technology, in combination with reduced running and maintenance  
64 costs, means that OPM-based MEG could be used more widely than current MEG  
65 systems, and may become an affordable alternative to scalp EEG, with the potential  
66 benefits of increased spatial accuracy, reduced sensitivity to volume conduction/field  
67 spread, and increased sensitivity to deep sources. Wearable MEG thus provides an  
68 unprecedented opportunity for epilepsy, and given its patient-friendliness, we envisage  
69 that it will not only be used for presurgical evaluation of epilepsy patients, but also for  
70 diagnosis after a first seizure.

71

72

73 **Key Words:**

74 Optically Pumped Magnetometers, Magnetoencephalography, ictal, interictal  
75 epileptiform discharges, seizure, refractory epilepsy

76

## 77 **1. Introduction**

78 Magneto- and Electroencephalography (MEG/EEG) are important techniques for the  
79 diagnosis (Colon et al., 2009) and pre-surgical evaluation (Nissen et al., 2016; Rampp  
80 et al., 2019) of epilepsy. For patients with focal refractory epilepsy, seizure freedom  
81 can be achieved through epilepsy surgery by removing the epileptogenic zone (EZ),  
82 which is defined as the area of cortex that is necessary and sufficient for initiating  
83 seizures and whose removal (or disconnection) is necessary for complete abolition of  
84 seizures (Luders et al., 2006). This requires the generation of a hypothesis about the  
85 location of the EZ during the pre-surgical workup using measurements from non-  
86 invasive techniques such as MEG/EEG, or invasive recordings using intracranial  
87 electrodes (Shah and Mittal, 2014). Interictal epileptiform discharges (IEDs) and ictal  
88 activity as identified in presurgical MEG/EEG help to identify the irritative zone (the  
89 area of cortical tissue that generates IEDs) and the seizure onset zone (the area of cortex  
90 from which clinical seizures are generated), respectively, both of which may overlap  
91 with the EZ (Jehi, 2018; Rosenow and Luders, 2001). The pre-surgical workup, and  
92 thereby surgery, needs to be improved though, as seizure freedom is currently achieved  
93 in only two-thirds of the patients who undergo surgery (Najm et al., 2013; Tellez-  
94 Zenteno and Wiebe, 2008).

95 Current techniques have their limitations: invasive EEG is burdensome to the  
96 patient, expensive, has risk of complications, and may still be inconclusive (Bekelis et  
97 al., 2013). Clinical scalp-EEG recordings have limited spatial resolution, which can be  
98 mitigated to some extent with high-density recordings in combination with advanced  
99 head- and source-modelling (Mégevand and Seeck, 2020; Nemtsas et al., 2017).  
100 Although MEG generally has a higher spatial resolution, its sensitivity to activity from  
101 deep structures could improve when recordings with higher signal-to-noise ratios  
102 (SNRs) are available (Hillebrand and Barnes, 2002). In current cryogen-based SQUID  
103 (Superconducting Quantum Interference Device) systems the SNR and spatial  
104 resolution is ultimately constrained by the distance between the scalp and sensors that  
105 is required for thermal isolation. As these fixed-helmet systems are typically designed  
106 for adults, SNR and spatial resolution are further decreased when recording in children.  
107 In addition, ictal recordings with SQUID-based helmet systems are problematic due to  
108 movement artefacts, and because long-term observations are not feasible. The ability to  
109 record seizure activity is of clinical importance, as this provides the most reliable  
110 information with regards to the location of the EZ.

111 Newly developed, cryogen-free, MEG sensors - Optically Pumped  
112 Magnetometers (OPMs) - provide an unprecedented opportunity for epilepsy, since  
113 they enable non-invasive, wearable recordings with whole-head sensitivity for ictal and  
114 interictal activity. OPMs are small and lightweight, yet have a sensitivity that is  
115 comparable to that of SQUIDS (Osborne et al., 2018). Importantly, they can be placed  
116 directly on the scalp (Colombo et al., 2016; Sander et al., 2012; Shah and Wakai, 2013),  
117 thereby improving SNRs (Boto et al., 2016; Boto et al., 2017; Iivanainen et al., 2017)  
118 and consequently the sensitivity to, and localisation accuracy of, epileptiform activity.  
119 Moreover, wearable OPM-based arrays could allow recordings to be made during the  
120 ictal period, and also open up the possibility for long-term observations (Alem et al.,  
121 2014).

122 OPM sensors are passive magnetic field sensors: the transmission of laser light  
123 through a gas cell containing a vapour of spin-polarised rubidium atoms reduces in the  
124 presence of an external magnetic field, thus providing a highly sensitive measure of the  
125 local magnetic field (Tierney et al., 2019). The technique of using alkali vapour cell  
126 OPMs to measure magnetic fields is over five decades old (Dupont-Roc et al., 1969),  
127 yet in the last decade, since the innovation of high performance semiconductor lasers  
128 and miniaturisation of optics, OPMs have been miniaturised and commercialised to a  
129 footprint and performance suitable for MEG. The viability of the OPM technology in  
130 healthy human subjects has recently been demonstrated (Boto et al., 2018), and this  
131 breakthrough work has been followed-up by an increasing body of work with OPMs  
132 (Brookes et al., 2022; Tierney et al., 2019), including, for example, their use in children  
133 (Hill et al., 2019), assessment of sensory and motor modalities (Borna et al., 2020; Boto  
134 et al., 2019; Iivanainen et al., 2020; Roberts et al., 2019), language lateralization and  
135 localisation (Tierney et al., 2018), speech processing (de Lange et al., 2021), and the  
136 estimation of functional interactions between brain regions (Boto et al., 2021). The  
137 potential advantages of OPMs in a clinical setting have also been recognized, with  
138 several groups demonstrating their utility in epilepsy. Alem and colleagues used OPMs  
139 to record IEDs in a rat model of epilepsy (Alem et al., 2014), with confirmation from  
140 intracranial electrical recordings. Feasibility in humans has been demonstrated with a  
141 single adult patient (Vivekananda et al., 2020). However, ictal recordings and a direct  
142 comparison with SQUID-MEG recordings were not performed. More recently, Feys  
143 and colleagues reported on the relative merits of OPMs in childhood epilepsy, showing

144 that compared to SQUIDs the IEDs recorded with OPMs had higher SNR for 4 out of  
145 the 5 children studied, and higher amplitude for all (Feys et al., 2022).

146 The theoretical advantages of OPMs over SQUID-based MEG, which include  
147 higher SNRs and more accurate source reconstructions, have been demonstrated in  
148 modelling (Boto et al., 2016; Iivanainen et al., 2017) and experimental (Boto et al.,  
149 2017; Feys et al., 2022) studies. To demonstrate the advantages of higher SNRs in a  
150 clinical setting we studied six patients with focal, drug-resistant epilepsy, with  
151 previously characterised sources of IEDs: three adults with deep or weak sources, and  
152 three children with focal epilepsy, in order to demonstrate that by using on-scalp sensors  
153 instead of the standard, adult-sized, helmet the sensitivity to, and SNR of, epileptiform  
154 activity increases; a seventh, adult patient with frequent seizures was included in order  
155 to demonstrate another advantage of a wearable MEG system, namely that it enables  
156 seizure-recordings.

157

## 158 **2. Methods**

### 159 ***2.1 Patients***

160 We included seven patients with focal, drug-resistant epilepsy who had already  
161 undergone a successful clinical SQUID-based MEG at the Amsterdam UMC, location  
162 Vrije Universiteit Amsterdam, as part of their clinical workup for epilepsy surgery. The  
163 clinical SQUID-based MEG was deemed successful if the patient did not have  
164 claustrophobic or anxiety experiences, was cooperative and not restless, and did not  
165 cause many artefacts due to e.g. orthodontic material, and if IEDs could be identified.  
166 Three children 10-12 years of age were included. The four adult patients had also  
167 undergone invasive EEG recordings (stereo-EEG; sEEG), that were used to confirm the  
168 irritative zone as identified with MEG. One patient was selected because he had daily  
169 seizures. sEEG, in combination with seizure semiology, was used to confirm the seizure  
170 onset zone for this patient. None of these patients had undergone surgery for their  
171 epilepsy, because the hypothesised EZ was either bilateral in the mesial temporal lobes,  
172 multifocal, or near somatosensory areas, or for socioeconomic reasons. Patients used  
173 their regular anti-seizure medication on the day of the recordings, and were sleep  
174 deprived in order to increase the incidence of IEDs (Malow, 2004) (see Table 1 for  
175 details). Written informed consent was obtained from patients and/or their caretakers at  
176 inclusion, and the study was performed in accordance with the Declaration of Helsinki  
177 and approved by the VUmc Medical Ethics Committee.

|                                       | <b>Patient #1</b>                                                                                         | <b>Patient #2</b>                                                               | <b>Patient #3</b>                                              | <b>Patient #4</b>                                                         | <b>Patient #5</b>                                                 | <b>Patient #6</b>                                                                                                                                                                                                | <b>Patient #7</b>                                                                                                             |
|---------------------------------------|-----------------------------------------------------------------------------------------------------------|---------------------------------------------------------------------------------|----------------------------------------------------------------|---------------------------------------------------------------------------|-------------------------------------------------------------------|------------------------------------------------------------------------------------------------------------------------------------------------------------------------------------------------------------------|-------------------------------------------------------------------------------------------------------------------------------|
| <b>Age [yrs]</b>                      | 31-35                                                                                                     | 46-50                                                                           | 46-50                                                          | 11-15                                                                     | 11-15                                                             | 6-10                                                                                                                                                                                                             | 21-25                                                                                                                         |
| <b>Seizure type</b>                   | Focal impaired awareness                                                                                  | Focal impaired awareness (sometimes) to bilateral tonic clonic                  | Focal impaired awareness (sometimes) to bilateral tonic clonic | Focal impaired awareness                                                  | Focal aware                                                       | Focal impaired awareness                                                                                                                                                                                         | Focal impaired awareness                                                                                                      |
| <b>Medication</b>                     | Carbamazepine<br>Levetiracetam                                                                            | Carbamazepine<br>Clobazam<br>Levetiracetam<br>Topiramaat                        | Sodium valproate<br>Lacosamide                                 | Clobazam<br>Oxcarbazepine<br>Topiramaat                                   | Carbamazepine<br>Clobazam                                         | Sodium valproate<br>Sultiam                                                                                                                                                                                      | None <sup>#</sup>                                                                                                             |
| <b>Interval clinical MEG [months]</b> | 18                                                                                                        | 31                                                                              | 40                                                             | 17                                                                        | 45                                                                | 38*                                                                                                                                                                                                              | 6                                                                                                                             |
| <b>Clinical MEG abnormalities</b>     | Extensive bilateral epileptogenic network (L>R). Temporal, frontal, subcortical, insula                   | Focal abnormalities bilateral temporal: delta and epileptiform discharges (L>R) | Weak focal and epileptiform discharges R temporal              | Focal abnormalities and epileptiform discharges R parasagittal/precentral | Focal abnormalities and epileptiform discharges R centro-parietal | Focal abnormalities and epileptiform discharges R central, during sleep changing into focal ESES. Epileptogenic network involves R postcentral gyrus, parietal inferior lobe, temporal superior gyrus and insula | Focal abnormalities temporal: delta, and theta (L>R) + epileptiform abnormalities large area R fronto-temporal, basal, insula |
| <b>MRI abnormalities</b>              | Asymmetric gyral-sulcal pattern (R most deviant), with blurring of white-grey matter junction, R anterior | L mesiotemporal sclerosis                                                       | Old haemorrhage L temporal, probably from small CCM            | FCD R post- and partly precentral gyrus                                   | FCD R precentral gyrus                                            | None                                                                                                                                                                                                             | Small CCM L posterior temporal                                                                                                |

|                                     |                                                                                                                                       |                                                                                                      |                                                                                     |                                                                                    |                                                                                                                                     |                                                                                                  |                                                                                                                                                                                                                             |
|-------------------------------------|---------------------------------------------------------------------------------------------------------------------------------------|------------------------------------------------------------------------------------------------------|-------------------------------------------------------------------------------------|------------------------------------------------------------------------------------|-------------------------------------------------------------------------------------------------------------------------------------|--------------------------------------------------------------------------------------------------|-----------------------------------------------------------------------------------------------------------------------------------------------------------------------------------------------------------------------------|
|                                     | and anteromedial temporal                                                                                                             |                                                                                                      |                                                                                     |                                                                                    |                                                                                                                                     |                                                                                                  |                                                                                                                                                                                                                             |
| <b>Ictal EEG onset</b>              | Onset R temporal, then large area L temporal. Frequent spike-wave complexes over extended temporal area accompanied by (speech)arrest | Onset R temporal, with propagation to L hemisphere. UEO before UCO                                   | Onset R parieto-central (vertex), then propagation to contralateral. UCO before UEO | Onset mid central with sharp activity, slowing down to delta activity              | Onset R parietal (mainly mid parietal), then R centro-parietal with propagation to the midline and to some extent surrounding areas | Onset R central with fast propagation to frontal and parietal, and to L hemisphere               | Type 1: diffuse flattening followed by muscle artefacts due to hyperkinetic movements; R frontal then L temporal propagation. UCO before UEO (apart from occasional diffuse flattening). Type 2: R temporal. UCO before UEO |
| <b>Interictal EEG abnormalities</b> | Epileptiform discharges over large L and R temporal area. R temporal series of 0.5 seconds 22 Hz beta activity, suspect MCD           | Temporal L>R delta/theta. Epileptiform discharges (sharp slow waves) L temporal or frontal           | Focal and epileptiform discharges R frontotemporal, parietal, and L frontotemporal  | Epileptiform discharges mid to R central. Focal slow activity R posterior temporal | Sharp slow wave complexes centro-parietal, mainly during (falling) asleep, sporadically in awake state, also post-ictally           | Frequent epileptiform discharges and continuous slow activity R central operculum. In sleep ESES | Temporal, insular and fronto-basal delta, theta (L>R). Epileptiform discharges R fronto-basal, temporal, insular. During sleep sharper, and possibly L>R                                                                    |
| <b>Other imaging modalities</b>     | Normal FDG-PET                                                                                                                        | FDG-PET: hypometabolism L temporal: hippocampus, mesial temporal and anterior temporal, extending to | Normal PET                                                                          | Not performed                                                                      | Not performed                                                                                                                       | FDG-PET: hypometabolism central operculum (R>L)                                                  | FDG-PET-CT: hypometabolism L fronto-basal and possibly L temporal (neocortical and hippocampus)                                                                                                                             |

|                      |                                                                                                                                                                                                                                                                                                                                                                               |                                                                                                                                                                                                                                                                                                                                                                                                                                                                 |                                                                                                                                                                                                                                                                                                                                                                                                                                                                                             |               |               |               |                                                                                                                                                                                                                                                                                                                                                                                                                                                                                               |
|----------------------|-------------------------------------------------------------------------------------------------------------------------------------------------------------------------------------------------------------------------------------------------------------------------------------------------------------------------------------------------------------------------------|-----------------------------------------------------------------------------------------------------------------------------------------------------------------------------------------------------------------------------------------------------------------------------------------------------------------------------------------------------------------------------------------------------------------------------------------------------------------|---------------------------------------------------------------------------------------------------------------------------------------------------------------------------------------------------------------------------------------------------------------------------------------------------------------------------------------------------------------------------------------------------------------------------------------------------------------------------------------------|---------------|---------------|---------------|-----------------------------------------------------------------------------------------------------------------------------------------------------------------------------------------------------------------------------------------------------------------------------------------------------------------------------------------------------------------------------------------------------------------------------------------------------------------------------------------------|
|                      |                                                                                                                                                                                                                                                                                                                                                                               | neocortical temporal                                                                                                                                                                                                                                                                                                                                                                                                                                            |                                                                                                                                                                                                                                                                                                                                                                                                                                                                                             |               |               |               |                                                                                                                                                                                                                                                                                                                                                                                                                                                                                               |
| <b>sEEG findings</b> | <p>Multifocal onset (often R temporal) in extensive bilateral epileptogenic network (R&gt;L)<br/>At least once UCO before UEO</p> <p>ICES: recognizable aura symptoms on several contact points, but not consistently in one lobe or on one side (fear, feeling weird, difficult to describe). No unequivocal contact point with semiology as during spontaneous seizures</p> | <p>Onset in L or R hippocampus, with propagation to L hemisphere in the latter case.<br/>Interictal: L&gt;R hippocampus</p> <p>ICES: L and R hippocampal focal seizure with clinically only anterograde amnesia.<br/>Following stimulation of the L anterior insula electrode (contact points in the insula as well as contact points located more frontally) symptoms of dizziness occurred, which were recognized as seizure onset symptom by the patient</p> | <p>Extensive and bilateral epileptogenic network, with onset R parietal (MEG focus)</p> <p>ICES:<br/>Seizures with semiology as during spontaneous seizures, as well as subclinical seizures, following stimulation L and R hippocampus and R parietal, with propagation to R parietal. R parietal stimulation gives semiology equal to that of the start of spontaneous seizures. Many contact points with local and regional discharges, often at relatively low stimulus intensities</p> | Not performed | Not performed | Not performed | <p>Focal seizures independent from R and L HC (R &gt; L). Seizures with HCL onset came with hyperkinetic movements and also occurred while awake; 1 seizure showed rapid propagation to HCR and further R temporal propagation. Majority of seizures with HCR onset occurred during sleep, with more subtle semiology (although not completely stereotypical R temporal semiology, sometimes also hyperkinetic movements)</p> <p>Interictal epileptiform abnormalities on ~all electrodes</p> |



|                                      |                                                                                                                                                  |                                                                                                                                                                                                                              |                                                                                                                                                                                                                                                                            |                                                                                                                               |                                                                                                                                                                                                                                      |                                                                                                                                                                                                    |                                                            |
|--------------------------------------|--------------------------------------------------------------------------------------------------------------------------------------------------|------------------------------------------------------------------------------------------------------------------------------------------------------------------------------------------------------------------------------|----------------------------------------------------------------------------------------------------------------------------------------------------------------------------------------------------------------------------------------------------------------------------|-------------------------------------------------------------------------------------------------------------------------------|--------------------------------------------------------------------------------------------------------------------------------------------------------------------------------------------------------------------------------------|----------------------------------------------------------------------------------------------------------------------------------------------------------------------------------------------------|------------------------------------------------------------|
|                                      |                                                                                                                                                  |                                                                                                                                                                                                                              |                                                                                                                                                                                                                                                                            |                                                                                                                               |                                                                                                                                                                                                                                      |                                                                                                                                                                                                    | ICES: R temporal lobe seizure with more temporal semiology |
| <b>Semiology</b>                     | Impaired awareness for several minutes, with postictal confusion. Periods of 1-2 days with episodes of reduced concentration and amnesic aphasia | Provocation: stress. Sometimes dizziness just before seizure. Onset arrest, non-forced head- and eye-deviation towards R. Oro-alimentary automatisms Post-ictal: agitated and long-lasting receptive- and expressive aphasia | Starts during sleep. Lightheaded and vertigo. Eye-opening, clonic movements L face, followed by L hand/arm, forced head turn to the left. Can say that he is in a bad dream. Post-ictal: Sometimes visual aura (wires of silver paper). Often micturition. Amnesic aphasia | Mainly tonic L arm symptoms, frontal hyperkinetic component, deep breathing. Indicative of pre-rather than postcentral origin | Tingling in L arm/hand and weird sensations in L arm. Tonic L arm, clonic movements of L arm, head- and eye-deviation towards L with or without spinning towards L, and sometimes clonic movements orofacial. Awareness not affected | Mainly nightly seizures<br>1) Hypersalivation, eyelid myoclonus, oro-alimentary automatisms, noisy breathing, fluctuating awareness<br>2) tonic L arm sits-up, confused, sometimes motor agitation | See Supplementary Material <sup>‡</sup>                    |
| <b>OPM placement</b>                 | L temporal; R temporal                                                                                                                           | L temporal; R temporal                                                                                                                                                                                                       | R temporal/parietal                                                                                                                                                                                                                                                        | R central                                                                                                                     | R centro-parietal                                                                                                                                                                                                                    | R central/superior temporal                                                                                                                                                                        | L and R temporal                                           |
| <b>#hours sleep before recording</b> | 4                                                                                                                                                | 4                                                                                                                                                                                                                            | 4                                                                                                                                                                                                                                                                          | 7                                                                                                                             | 4.5                                                                                                                                                                                                                                  | 7                                                                                                                                                                                                  | 0                                                          |

178 **Table 1:** Patient characteristics and recording preparation, showing the location of IEDs in MEG and EEG, ictal EEG onset, interictal and ictal sEEG findings, PET and CT  
179 abnormalities, MRI findings, and semiology. All patients were male, and all patients slept less than usual the night before the recordings. OPM placement indicates where the  
180 OPMs were placed. L = left; R = right; CCM = Cerebral Cavernous Malformation; CT = Computed Tomography; ESES = Electrical Status Epilepticus during slow-wave Sleep;  
181 FDG-PET = Fluorodeoxyglucose-Positron Emission Tomography; HC = hippocampus; ICES = IntraCranial Electrical Stimulation; MCD = Malformation of Cortical  
182 Development; MRI = Magnetic Resonance Image; REM = rapid eye movement; UCO = unequivocal clinical onset; UEO = unequivocal electrographic onset; \*contained  
183 artefacts due to orthodontic material, yet data was interpretable; #after trying many: anti-seizure medication resulted in either one or more of the following: itchiness, eczema,  
184 drowsiness, memory problems, mood disturbances, fear, and had no sustained effect on the severity or frequency of seizures; †on average 8 seizures/night in the weeks before  
185 the OPM recording.

## 186 **2.2 OPM setup, recordings and analyses**

### 187 **2.2.1 OPM sensors**

188 Six, commercially available Gen2.0 OPMs (QuSpin Inc, Louisville, CO, USA; Zero  
189 field magnetometer, 2<sup>nd</sup> Generation, dual-axis measurement), with sensitivities of 7-13  
190 fT/ $\sqrt{\text{Hz}}$  and a dynamic range of  $\pm 5$  nT (Osborne et al., 2018), were used. We recorded  
191 simultaneously along both the radial and a tangential axis to increase the number of  
192 measurements and to increase the separability of neuronal and noise signals (Brookes  
193 et al., 2021; Nurminen et al., 2013; Rea et al., 2022; Tierney et al., 2021a; Tierney et  
194 al., 2022), at a cost of a slight reduction in sensitivity (Osborne et al., 2018). The sensors  
195 operate in the spin exchange relaxation-free regime, and the (near) zero-field  
196 environment is achieved through ‘on-sensor’ electromagnetic coils wrapped around the  
197 vapour cell, that can compensate for remnant fields in the magnetically shielded room  
198 (MSR) of up to 50 nT. Before a recording was started, these coils were activated and  
199 optimised for a fixed sensor position and orientation, using QuSpin’s QZFM UI  
200 acquisition software (version 6.5.10; using [X, Y, Z]-field zeroing and analog output  
201 gain of 0.33). Data were recorded with a sampling frequency of 600 Hz using a National  
202 Instruments 16-bit NI-9205 ADC interfaced with a LabVIEW (National Instruments  
203 (NI) Corporation, Austin, TX) programme developed at the University of Nottingham.  
204 The same software was also used to control coil-drivers (QuSpin Inc), using a 16-bit  
205 NI-9264 DAC module, for dynamic noise compensation (see below).

206

### 207 **2.2.2 Noise compensation**

208 All MEG recordings were performed in a MSR (Vacuumschmelze GmbH, Hanau,  
209 Germany) that houses both the OPM-system and a 306-channel cryogenic system  
210 (Triux Neo; MEGIN OY, Espoo, Finland). The cold-head, which is part of the internal  
211 helium liquefier of the cryogenic system, causes static fields with a magnitude of  $\sim 300$   
212 nT, which is outside the OPMs operational range of 50 nT. We therefore installed a set  
213 of coils around the cold-head to minimise the field and gradients in the direction of the  
214 long-wall of the MSR (Figure 1). The magnitude of the remnant fields in the MSR was  
215 reduced to  $\sim 30$  nT, using a maximum current of 4A (to avoid overheating) from a low-  
216 noise power supply (HMP2020; Rohde & Schwarz GmbH & Co. KG, Munich), fed  
217 through an RC lowpass filter unit ( $-3\text{dB}$  at 0.2 Hz) to reduce current noise. A set of 5  
218 bi-planar coils (Holmes et al., 2019) was then used to bring the remnant fields within  
219 the dynamic range of the OPMs (Figure S1). This coil set generates the three uniform

220 field components and five (linear) magnetic field gradient components to produce a  
221 magnetic field which is equal and opposite to that experienced by the OPM array. To  
222 compensate the field, two three-axis fluxgates (Bartington Instruments Ltd, Witney,  
223 UK; MAG-13MSQ100) were used as reference sensors, and placed at two diagonally  
224 opposite corners of the virtual nulling-volume (Figure 1). The output of the fluxgates  
225 was digitised using a 24-bit NI-9207 ADC module and visualised using the LabVIEW  
226 programme. Through manual adjustment of the coil-drivers the remnant fields could be  
227 reduced to  $\sim 1$  nT, following which the fluxgates were removed and OPM recordings  
228 could be performed. Due to fluctuation in our inner-city environment, field levels would  
229 typically reach levels of  $\sim 4$  nT again within a few minutes (Figure 2).

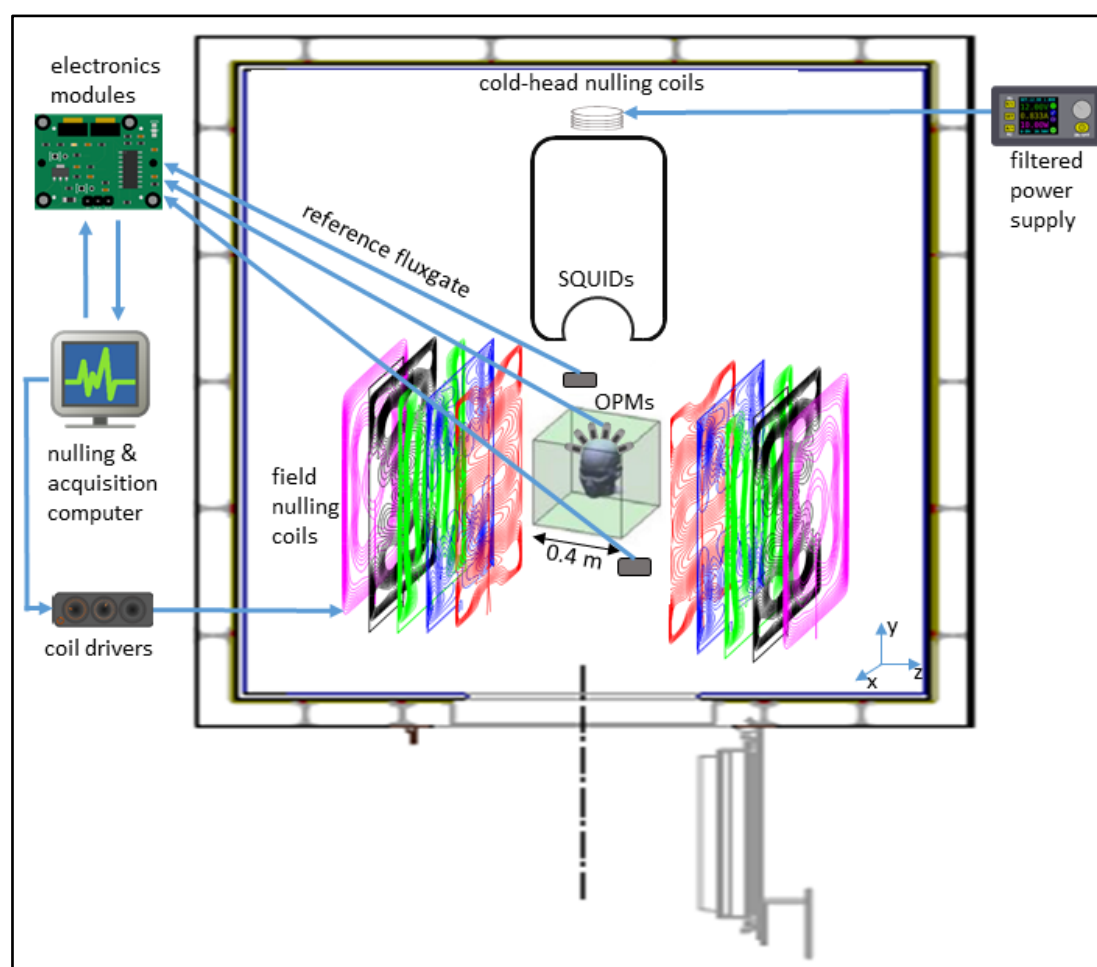

230  
231 **Figure 1: System setup.** The whole OPM-system was placed in a magnetically shielded room, together  
232 with the SQUID-based system. The cold-head, which is part of the helium liquefier of the SQUID-  
233 system, caused static fields with a magnitude of  $\sim 300$  nT. Compensation coils around the cold-head  
234 reduced these fields to  $\sim 30$  nT. Field-nulling coils were wound on five large planes placed either side of  
235 the participant, different coloured wirepaths show coils designed to produce different field components  
236 (shown deliberately offset here; see also Figure S1). Two fluxgates, placed near the location of where  
237 the patient's head will be during the recordings, were used to record the remnant (static) background  
238 fields, and the user manually adjusted the current through the field-nulling coils in order to bring the  
239 remnant field level down to  $\sim 1$  nT. During the patient-recordings, the low-pass ( $< 3$  Hz) filtered signals  
240 from the OPMs themselves were used to dynamically compensate for temporal variations in the remnant  
241 fields, so that the field experienced by the OPMs in a typical recording remained below 0.4 nT.

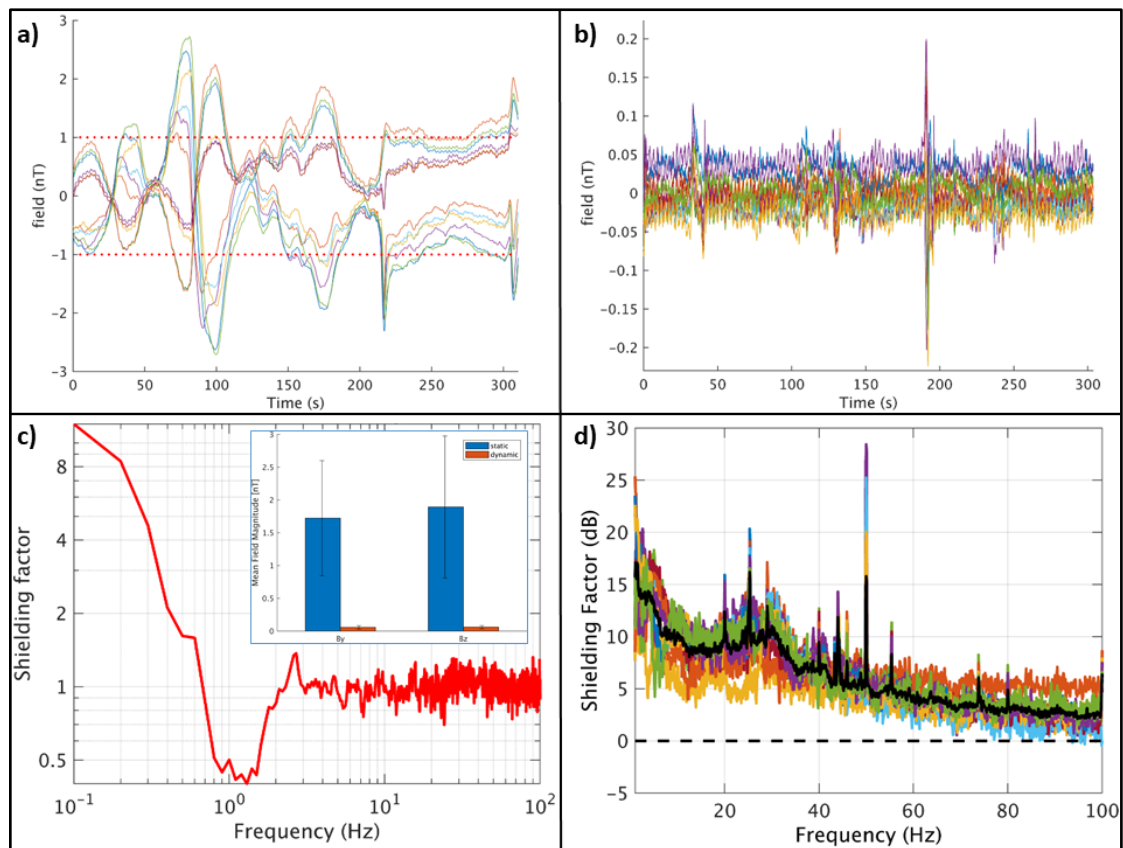

242  
 243 **Figure 2: Performance of static and dynamic nulling, and Homogenous Field Correction.** Before  
 244 the patient recordings, the dynamic nulling performance was quantified with a 5-minute empty-room  
 245 recording with the OPMs in the patient-helmet (here: patient #5). Panel **a** shows the data for all 12  
 246 channels with only compensation of the static remnant magnetic field (using internal and external coils).  
 247 Note that the remnant fields did not remain below 1 nT throughout the recording due to fluctuations in  
 248 the environmental magnetic fields. However, when dynamic nulling was applied (panel **b**), the change  
 249 in field could be kept below 0.3 nT. The shielding factor (panel **c**; computed as the power spectral density  
 250 for the dynamic nulling divided by the power spectral density for the static nulling) was above 1 for  
 251 frequencies below 0.7 Hz, with a maximum of 12 for 0.1 Hz, and approximately 1 above 2.5 Hz. In  
 252 between 0.7 and 2.5 Hz the shielding factor was smaller than 1, which is due to noise that is introduced  
 253 by the choice of the PID-controller's gains. The inset shows the field magnitude (L2-norm) of the field  
 254 for the 12 channels (By- and Bz-direction separately) averaged over time (with error-bars showing the  
 255 standard deviation) with static (blue) and dynamic (red) nulling applied, showing that dynamic nulling  
 256 decreased the field magnitude with a factor 30. The field magnitude averaged over the empty-room  
 257 recordings for the 7 patients was 0.09 and 0.11 nT for By and Bz, respectively (not shown), with the  
 258 maximum absolute field in a channel never exceeding 0.7 nT. Panel **d** shows how Homogenous Field  
 259 Correction further removes noise from the recorded data (recording 1 from patient #5). The black line  
 260 denotes the HFC shielding factor (in dB) averaged over all channels (coloured lines).  
 261

262 Movement of the sensors through such remnant fields during a patient recording would  
 263 send them outside their dynamic range, and even without such movements the remnant  
 264 fields would degrade the signal fidelity through cross-axis projection errors (Borna et  
 265 al., 2022). We therefore used dynamic compensation (Holmes et al., 2019; Iivanainen  
 266 et al., 2019), based on the OPMs themselves, to reduce the remnant fields further and  
 267 to keep them stable during an experiment. First, the response of the OPMs to a known  
 268 current was determined by sequentially sending pulses (50 msec, 0.4 V) to the coils,

269 resulting in an 8 (coils) x 12 (sensors) calibration matrix. During a recording, the  
270 inverted calibration matrix was used to set the required voltage outputs for the coil-  
271 drivers to minimise the sum-of-squares of the sensor outputs. A proportional–integral–  
272 derivative (PID) controller was used to drive the sensor outputs towards zero, using  
273 manually tuned proportional and integral gains (derivative gains were set to zero). As  
274 input to the PID, the averages of 20-sample segments of data for all 12 channels were  
275 used, sampled at 600 Hz and digitally filtered at 3 Hz with a fifth-order low-pass  
276 Butterworth filter (chosen so that the controller would not remove the (brain) signals of  
277 interest from the OPM recordings). This reduced the maximum field changes  
278 experienced by the sensors to <0.4 nT (Figure 2) during empty-room recordings. During  
279 patient-recordings, the reduced static remnant fields and gradients ensured that head-  
280 movements were better tolerated (Boto et al., 2018; Holmes et al., 2018), and the  
281 dynamic compensation ensured that remnant fields/gradients remained small  
282 throughout the recordings.

283

### 284 **2.2.3 3D-printed helmets**

285 In order to keep the sensors firmly in place and on the scalp, individualised rigid 3D-  
286 printed helmets were constructed on the basis of the patients' anatomical magnetic  
287 resonance images (MRIs) that were available from the clinical workup. These were  
288 typically T1-weighted images recorded using a 3T scanner, with ~1 mm resolution. The  
289 scalp-surface was extracted from these MRIs, and a standard helmet design was  
290 projected onto this surface (for the children a 2mm offset was added in order to account  
291 for growth during the period (2-4 years) between MRI- and OPM-scan) (Siemens NX,  
292 version 1953; Siemens AG) in order to create a patient-specific helmet-model. The  
293 helmet-model contained a removable cap at the front so that the helmet could slide  
294 easily over the head, and openings for a chin strap to enable firm fixation of the helmet  
295 on the head (Figure 3). Individual OPM-holders, which included flexible side-legs to  
296 ease removal of the OPMs, were manually added to the helmet-model such that the  
297 OPMs would sample the dipolar field patterns that were produced by IEDs that were  
298 identified in the previously recorded clinical MEG. For the adult patients, the seizure  
299 onset zone, as identified in the stereo-EEG recordings, was also used to guide placement  
300 of the OPM-holders. The location of the vapour cell within the OPM casing was  
301 accounted for, assuming that OPMs were placed within the holder such that one  
302 sensitive axis was perpendicular to the head, and the other parallel to the head in the

303 nasion-inion direction. Three reference points were added to the model to enable co-  
304 registration of the helmet with the patient's head. The helmet-models were  
305 subsequently 3D-printed using biocompatible sintered PA12 (polyamide) nylon  
306 (Oceanz, Ede, The Netherlands). Before the patient recordings, the crosstalk between  
307 the OPMs was determined for each helmet design by sequentially activating the on-  
308 board coils and recording the responses of the remaining OPMs (see (Boto et al., 2018)  
309 for details). The maximum crosstalk for the different helmets was on average 1.4%  
310 (range: 0.90 - 1.91%), and was therefore not considered during further analyses (Boto  
311 et al., 2018; Tierney et al., 2019).

312

#### 313 **2.2.4 MEG-MRI co-registration**

314 Knowledge of the positions and orientations of the OPMs with respect to each other  
315 and the anatomy of the brain is required for source-reconstruction and array-based post-  
316 processing. The positions and orientations of the OPMs with respect to the helmet are  
317 known from the helmet modelling (assuming no errors in 3D-printing). The position of  
318 the helmet with respect to the head was determined by digitising the reference points  
319 on the 3D-printed helmet, as well as the nasion and pre-auriculars, the nose, outline of  
320 the helmet, and the forehead (when not fully covered by the helmet), using a 3D  
321 digitizer (Fastrak; Polhemus, Colchester, VT, USA). A rigid transformation of the three  
322 reference points then aligns the helmet (and OPMs) with the head (Figure 3). The head  
323 was co-registered to the patient's anatomical MRI through surface matching of the head  
324 surface as extracted from the anatomical MRI with the digitised nose and forehead, or  
325 though matching of the nasion and pre-auricular points when surface matching was not  
326 possible. Combining the two transforms provides co-registration of the OPMs with the  
327 brain anatomy (Figure 3).

328

#### 329 **2.2.5 OPM recordings**

330 Recordings were performed in the morning in seated position, with the OPM sensors in  
331 the centre of the virtual nulling-volume (Figure 1). Patients were instructed to sit still,  
332 with eyes closed, and were allowed to fall asleep during the recording. The calibration  
333 matrix for dynamic field compensation was determined, following which a 15-minute  
334

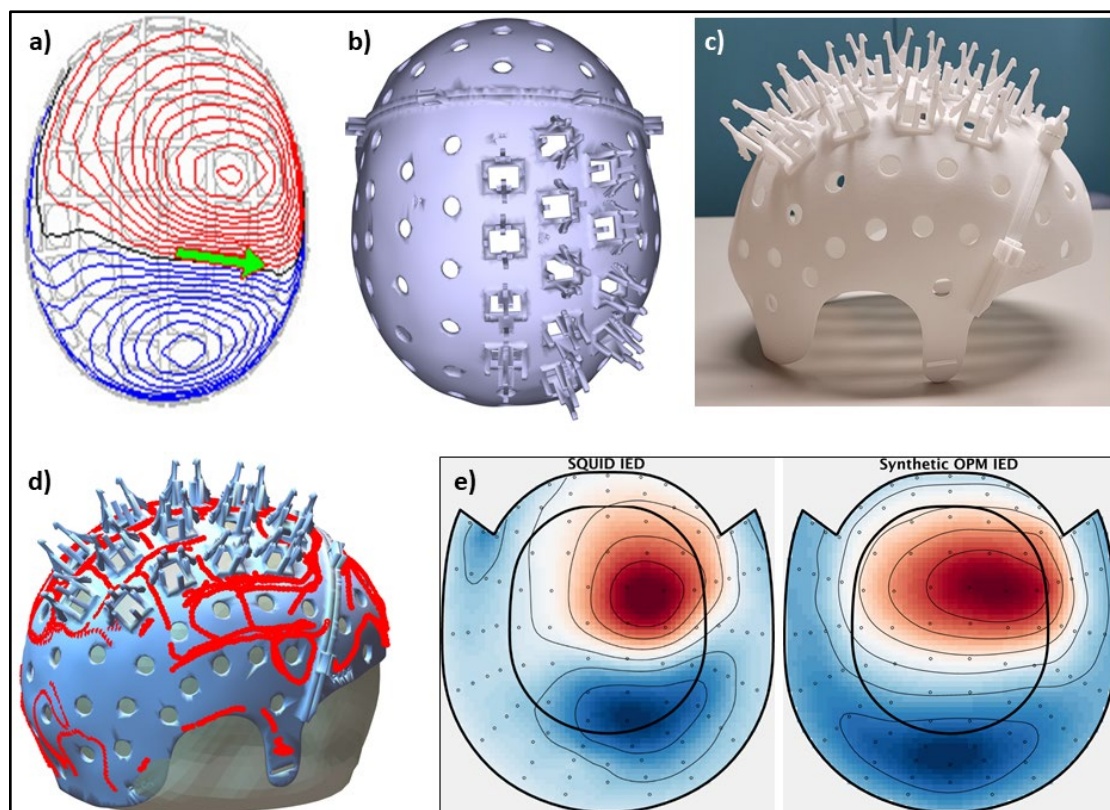

335  
336 **Figure 3: Helmet design for patient #4 and field patterns recorded with SQUIDS and OPMs.** a)  
337 Field pattern produced by IED (green arrow indicates the source-reconstructed equivalent current dipole)  
338 in the previously recorded clinical MEG, originating from, and in agreement with, a right central focal  
339 cortical dysplasia. b) 3D-helmet model, including removable front and OPM-holders. c) 3D-printed  
340 helmet. d) Digitised helmet points aligned with helmet-model, and co-registered to the anatomy (head  
341 surface from MRI). e) Field pattern for an IED recorded with the SQUID-based system (left), as well  
342 as field pattern for an IED recorded with the OPMs, projected onto the SQUID-sensor layout (after  
343 inverse/forward projection with minimum norm (Knösche, 2002; Marhl et al., 2022)). Note the good  
344 agreement between the IED field patterns, despite the limited sampling with the OPMs, suggesting that  
345 both systems recorded the same phenomenon. Also note the agreement with the previously recorded IED  
346 (panel a).  
347

348 OPM recording was started, as well as recording of the video-signal from the patient-  
349 monitoring system. The performance of the dynamic field compensation was monitored  
350 online, and if the noise compensation became unstable (due to large movements or a  
351 new head position that was incompatible with the calibration matrix), meaning that the  
352 feedback signal would diverge, a new recording was started. For patients with known  
353 bilateral IEDs, separate recordings were performed with OPMs over the left or right  
354 hemisphere (Table 1). For patient 7, three sensors were placed over each hemisphere.  
355 Because of the known semiology and to avoid the possibility that the patient would hurt  
356 himself or damage the OPM cabling, movement was restricted by a belt around the  
357 chest and bandages around the wrists. Recordings for this patient lasted until a seizure  
358 was recorded.  
359

### 360 **2.2.6 OPM pre-processing**

361 Despite the dynamic field compensation, the OPM recordings still contain interference  
362 from external (and internal) sources, as well as due to movement of the sensors through  
363 the remnant fields when the patients move their heads. Sophisticated spatial filtering  
364 techniques for noise removal, such as Signal Space Separation (Taulu et al., 2004),  
365 could not be applied to the 12 channel OPM-recordings, as the magnetic fields are  
366 undersampled and, more fundamentally, because the internal space basis set is invalid  
367 as a model of brain signals for on scalp sampling (Tierney et al., 2022; Wens, 2022).  
368 Tierney and colleagues have shown that as a first approximation the magnetic  
369 interference can be modelled as a spatially homogenous field, which can subsequently  
370 be regressed from the data (Hill et al., 2022; Seymour et al., 2022; Tierney et al., 2021a).  
371 Despite the low number of OPMs, noise was effectively removed, typically resulting in  
372 shielding by 15 dB at low frequencies (<2 Hz), line noise, and for artefacts with a sharp  
373 peak in the noise spectrum (24 Hz in our environment), 5-10 dB for frequencies  
374 between 2 and 50 Hz, and 5 dB and slowly declining above 50 Hz (Figure 2).

375

### 376 **2.2.7 OPM source reconstruction**

377 We applied beamforming (Hillebrand and Barnes, 2005; Hillebrand et al., 2005)  
378 because of its ability to remove interference (Adjamian et al., 2009) (Figure S4) and to  
379 align with our clinical work-flow (Hillebrand et al., 2016a), yet realising that the  
380 beamformer's ability to localise activity will be limited with a small number of sensors.  
381 The DAiSS toolbox in SPM (version 12) was used to reconstruct the time-series of  
382 neuronal activity (so-called virtual electrodes) for the centroids (Hillebrand et al.,  
383 2016b) of 246 regions of the Brainnetome atlas (BNA) (Fan et al., 2016). Broadband  
384 (0.5 – 48 Hz) beamformer weights were constructed, for which the data covariance  
385 matrix was filtered using a discrete-cosine-transform after applying a Hanning taper,  
386 5% Tikhonov regularisation was used when inverting the data covariance matrix. The  
387 lead fields were based on an equivalent current dipole source model with optimum  
388 orientation (Sekihara et al., 2004), and a single shell head model (Nolte, 2003) based  
389 on the inner skull-surface of the co-registered MRI, and the homogenous field  
390 correction was taken into account (Hipp and Siegel, 2015; Tierney et al., 2021a).  
391 Sensor-level data, filtered in the 3 – 48 Hz band with a fifth-order Butterworth filter,  
392 were subsequently projected through the normalised beamformer weights (Cheyne et  
393 al., 2006).



394

## 395 ***2.3 SQUID setup, recordings, and analyses***

### 396 ***2.3.1 SQUID setup***

397 The SQUID-recordings were performed with the cryogenic whole-head system, using  
398 our standard clinical protocol for epilepsy (Hillebrand et al., 2013). This includes the  
399 recording of two horizontal and one vertical electrooculography channel and an  
400 electrocardiography (ECG) channel, and continuous recording of the head position  
401 relative to the MEG sensors using signals from five head-localization coils. The  
402 positions of the head-localization coils and the outline of the patient's scalp and nose  
403 (~4000 points) were digitized using the 3D digitizer. These scalp/nose points were used  
404 for co-registration with the head surface as extracted from the patient's anatomical  
405 MRI, using surface matching.

406

### 407 ***2.3.2 SQUID recordings***

408 Recordings were performed in the afternoon in supine position, after switching off the  
409 cold-head compensation coils and bi-planar field-nulling coils. Data were recorded with  
410 a sample frequency of 1000 Hz, with an anti-aliasing filter of 330 Hz and a high-pass  
411 filter of 0.1 Hz. Internal active shielding (IAS) (Taulu et al., 2019), using MEGIN's in-  
412 wall feedback-coils, was used for patient #1, #2, and #5, but unavailable for the other  
413 patients due to technical problems. Four datasets of 15-minute duration were recorded  
414 in a task-free eyes-closed condition, during which the patients were allowed to fall  
415 asleep.

416

### 417 ***2.3.3 SQUID pre-processing***

418 Cross-validation Signal Space Separation (xSSS) (van Klink et al., 2017) was applied  
419 to aid visual inspection of the data. Channels that were malfunctioning, for example  
420 due to excessive noise, were identified by visual inspection of the data by A.H. (mean  
421 number of excluded channels was 8, range 6–10), and removed before applying the  
422 temporal extension of SSS to the raw data (MaxFilter, version 2.2.15; Elekta Neuromag  
423 Oy) (Taulu and Simola, 2006), using a subspace correlation limit of 0.9 and a sliding  
424 window of 10 sec.

425

### 426 ***2.3.4 SQUID source reconstruction***

427 Our default, atlas-based beamforming implementation was used (Hillebrand et al.,  
428 2012; Hillebrand et al., 2016b). Elekta's beamformer (version 2.1.28) reconstructed the  
429 time-series of neuronal activity for the centroids of the parcels in the BNA atlas.  
430 Broadband beamformer weights were computed, for which the data were filtered using  
431 a single-pass FIR filter in MaxFilter, using a Kaiser window with an order of 10000 and  
432 104, and attenuation of 60 dB at 0.35 Hz and 72 Hz, for the high pass (0.5 Hz) and low  
433 pass filter (48Hz), respectively. Singular value truncation was used when inverting the  
434 data covariance matrix to deal with the rank deficiency of the data after SSS, using a  
435 truncation limit of  $1e^{-6}$  times the largest singular value. An equivalent current dipole  
436 with optimum orientation (Sekihara et al., 2004) was used as source model, and a single  
437 sphere, based on the scalp-surface of the co-registered MRI, was used as head model.  
438 The broadband data were subsequently projected through the normalised beamformer  
439 weights (Cheyne et al., 2006), after which a 3 Hz high-pass filter was applied in  
440 MaxFilter (both at the sensor- and source-level) to enable comparison with the OPM  
441 data.

442

#### 443 **2.4 IED detection and quantification**

444 IEDs were visually identified at sensor- and source-level and marked by an experienced  
445 EEG/MEG technician (N.S.). Subsequently, an automatic algorithm (see  
446 Supplementary Material) was used to quantify the SNR of the IEDs at sensor-level, and  
447 to identify IEDs that were missed on visual inspection. A second assessor (A.H.)  
448 removed false positives from the automatically identified IEDs, using the waveforms  
449 and field maps of the visually identified IEDs as references. For the OPM data, field  
450 maps of IEDs identified in the SQUID data were used as reference and the OPM data  
451 were projected onto the SQUID-sensor layout to ease the comparison and identification  
452 of true positive IEDs (Figure 3). The remaining IEDs were compared between SQUID  
453 and OPM recordings for each patient in terms of Z-score (averaged over IEDs), as a  
454 proxy for SNR, and the spike-wave index (SWI), which is defined here as the  
455 percentage of seconds that contained an IED (Aeby et al., 2021). The average Z-scores  
456 were compared for each patient using the Mann-Whitney U test and an alpha of .05.  
457 Effect size was determined using Cliff's delta, and categorised as negligible ( $|d| <$   
458  $0.147$ ), small ( $0.147 \leq |d| < 0.33$ ), medium ( $0.33 \leq |d| < 0.474$ ), or large ( $|d| \geq 0.474$ ).

459

460

461 **3. Results**

462 Results of the analysis of the sensor-level OPM- and SQUID-based data are provided  
463 in Table 2.

464

|         | OPM            |       | SQUID          |       | SNR <sub>OPM</sub> vs SNR <sub>SQUID</sub> |           |         |
|---------|----------------|-------|----------------|-------|--------------------------------------------|-----------|---------|
|         |                |       |                |       | Mann-Whitney U                             | Cliff's d | p-value |
| Patient | SNR            | SWI   | SNR            | SWI   |                                            |           |         |
| #1      | 4.47<br>(0.43) | 6.42  | 4.57<br>(0.46) | 10.25 | -3.81                                      | -0.14     | 1e-4    |
| #2      | -              | 0     | -              | 0     | -                                          |           | -       |
| #3      | 3.85<br>(0.32) | 9.00* | 3.93<br>(0.35) | 6.76  | -2.86                                      | -0.14     | .0043   |
| #4      | 4.05<br>(0.48) | 11.03 | 4.39<br>(0.61) | 24.50 | -9.53                                      | -0.36     | 2e-21   |
| #5      | -              | 0     | -              | 0     | -                                          |           | -       |
| #6      | 6.15<br>(0.98) | 0.53* | -              | 0     | -                                          |           | -       |

465 **Table 2:** SNR and frequency of occurrence of epileptiform activity for the OPM- and SQUID-based  
466 (gradiometers only) sensor-level data. The SNR averaged (and standard deviation) over IEDs is reported.  
467 \*based on the datasets that contained epileptiform activity.

468

469 Patient #1 showed many short and long series of spike-wave complexes in both the  
470 OPM and SQUID data, over both the left and right temporal lobes (Figure 4). Five  
471 recordings were performed with the OPMs over the left hemisphere (average duration  
472 709 sec; range: 306-906 sec), and four with the OPMs over the right hemisphere  
473 (average duration 811 sec; range: 716-901 sec). The SWI was higher for the SQUID  
474 data (10.25) than for the OPM data (6.42). This could be explained by the presence of  
475 (partly) independent left- and right-temporal IEDs in combination with the unilateral  
476 coverage during the OPM recordings: when considering only unilateral temporal  
477 channels in the SQUID data, the SWI dropped down to 6.11 for the left hemisphere,  
478 and 6.58 for the right hemisphere, and thereby became comparable to the SWI of the  
479 OPM data. The difference between the SNR of the IEDs in the OPM data and SQUID  
480 data was negligible (4.47 versus 4.57;  $U = -3.81$ ,  $d = -0.14$ ,  $p = 1e-4$ ).

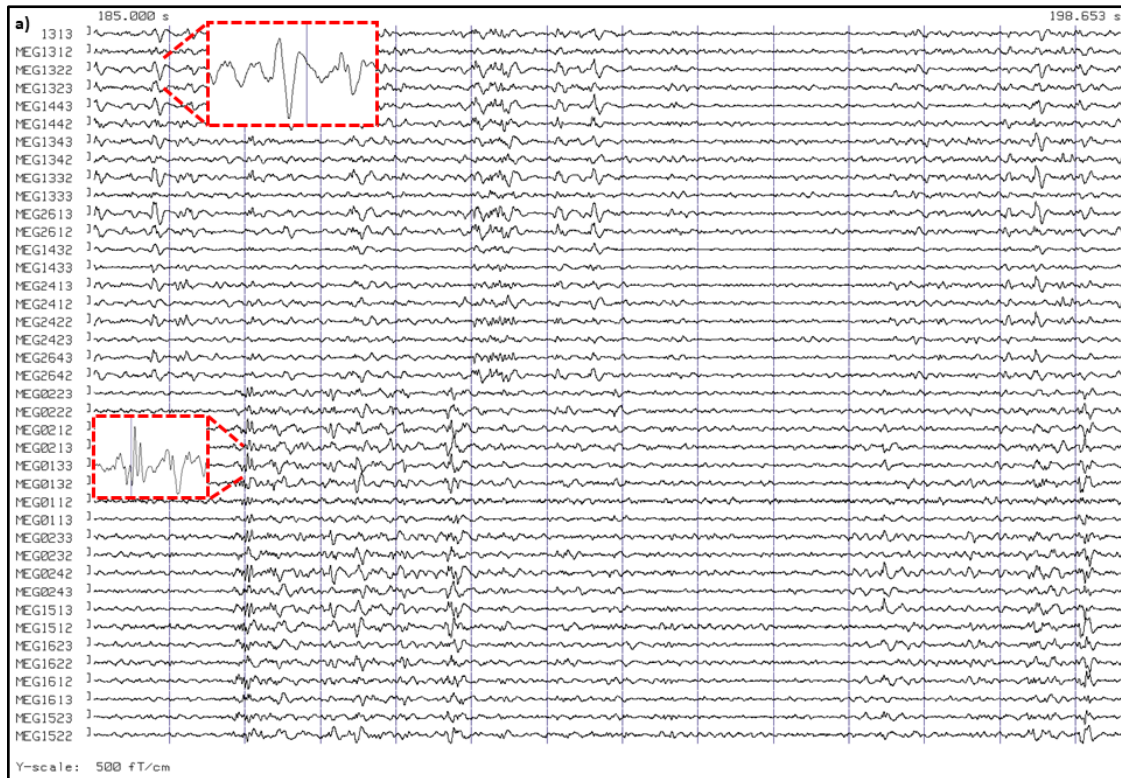

481

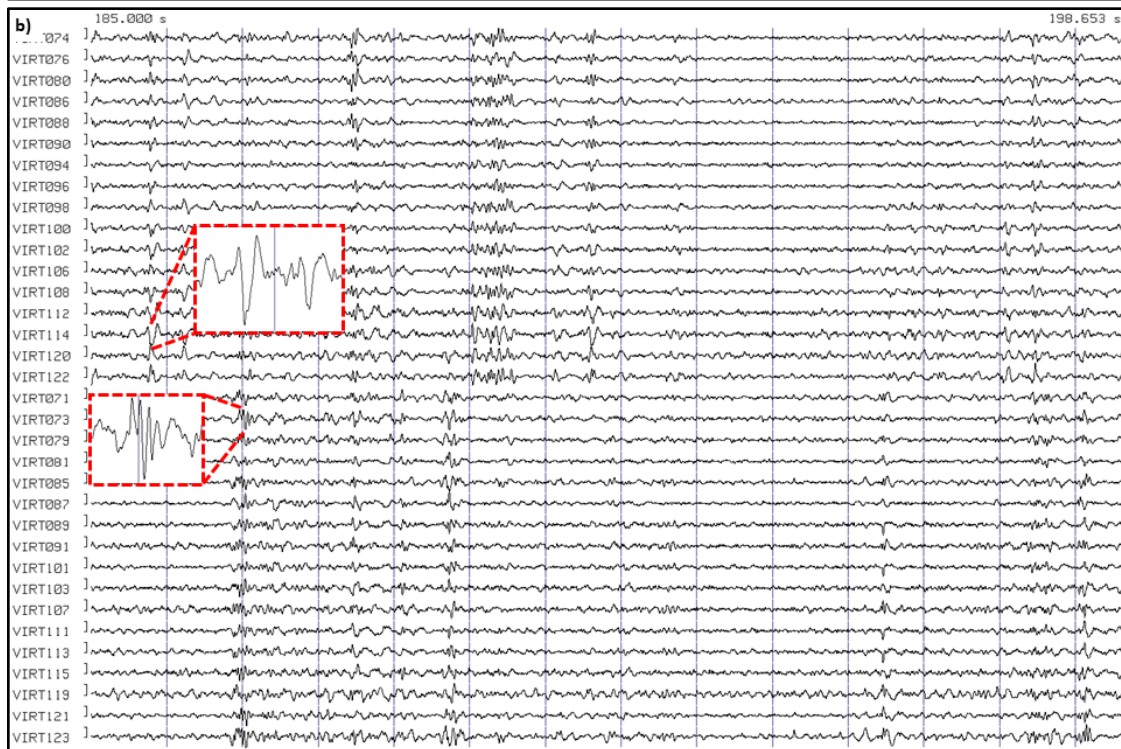

482

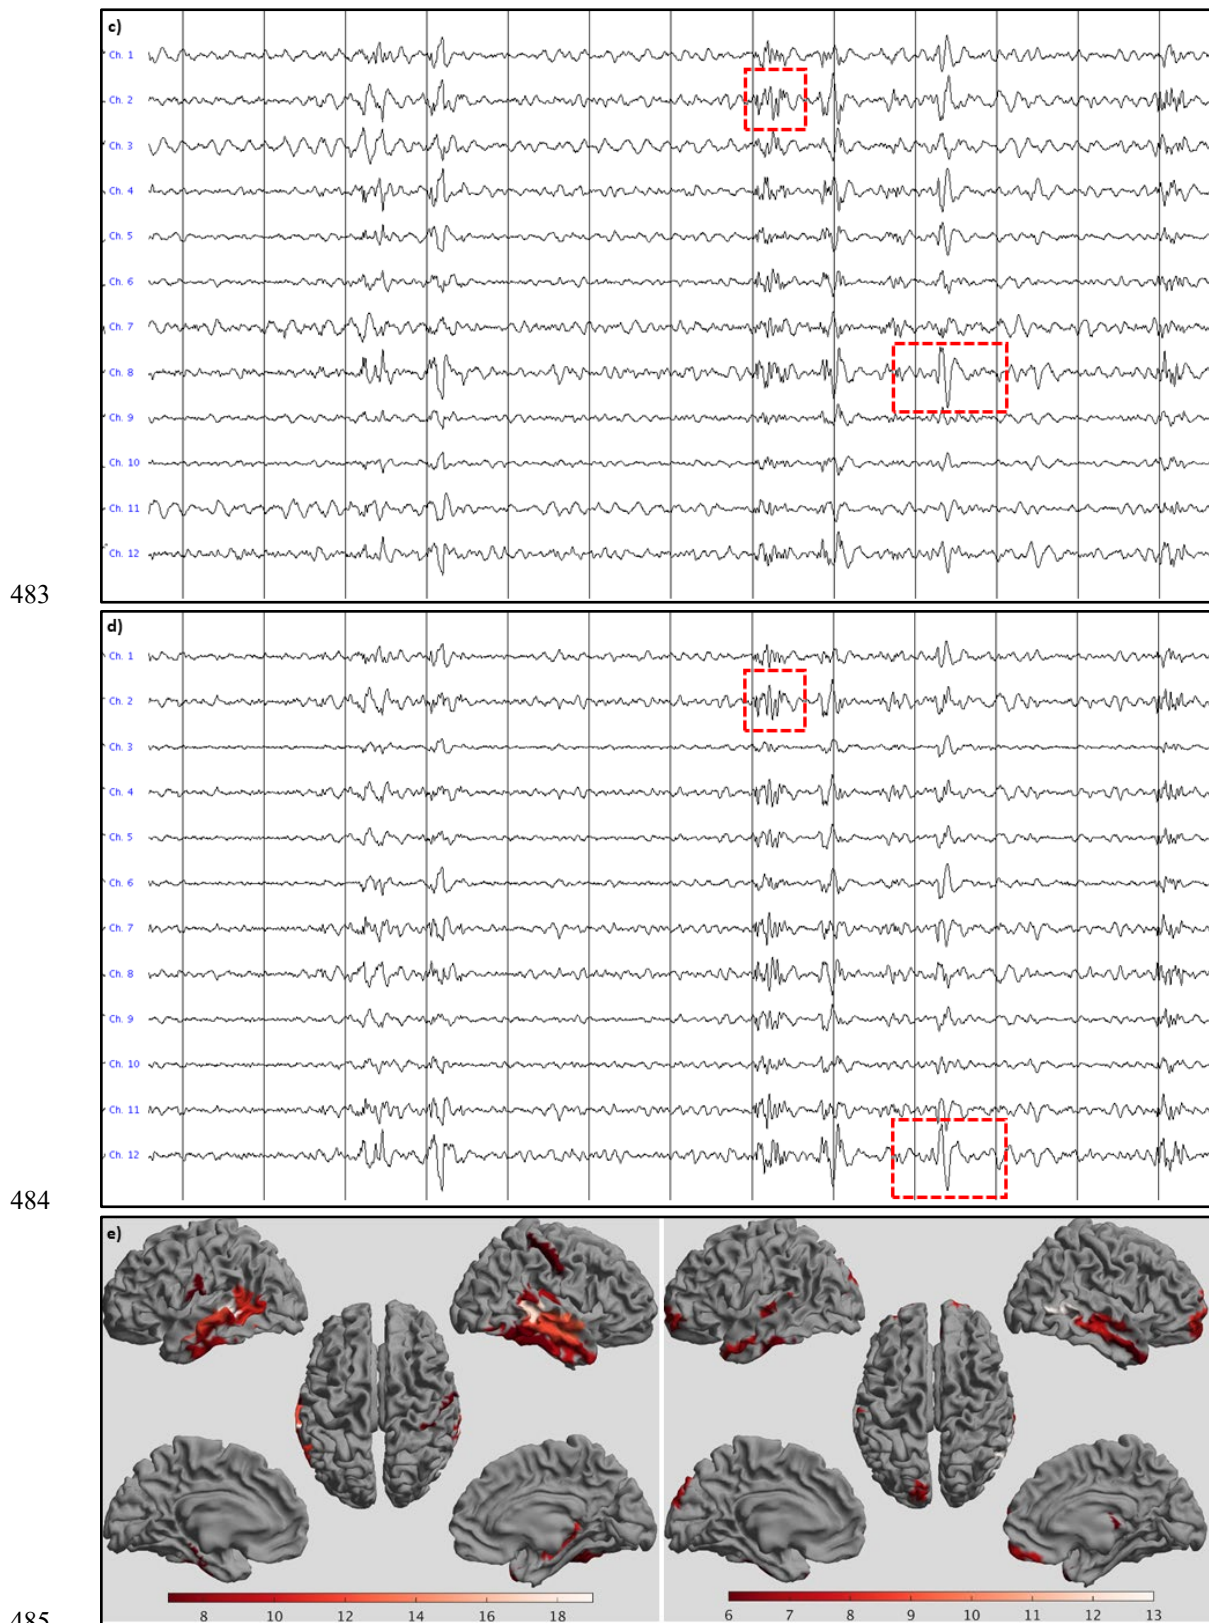

486 **Figure 4: Examples of epileptiform activity for patient #1.** IEDs were recorded with SQUIDS (a, b)  
487 and OPMs (c, d) at sensor-level (a, c) and source-level (b, d, e). a) 13.653 seconds of data for a selection  
488 of gradiometers over the left (upper half) and right (bottom half) temporal lobes. The grey vertical lines  
489 mark 1 second of data, filtered between 3 - 48 Hz. Note the presence of (many) IEDs over both  
490 hemispheres, with some examples highlighted. b) Virtual electrodes for a selection of the left (upper half)  
491 and right (lower half) temporal ROIs of the BNA atlas. c) Comparable signals were recorded with the six  
492 OPMs, placed over the left temporal lobe in this case (recorded earlier in the day). Alternating channels

493 show recording in the OPMs' By and Bz direction. As for the SQUID data, some of the spike-waves and  
494 polyspikes are highlighted. **d)** Virtual electrode data for the same data segment (selection of left temporal  
495 BNA ROIs). **e)** Number of times a region showed the maximum SNR (over all 246 ROIs) for the events  
496 that had been identified at sensor-level (total over all datasets) for SQUID (left) and OPM data (right).  
497 Results are displayed, with an arbitrary threshold, as a color-coded map on the parcellated template  
498 brain, viewed from, in clockwise order, the left, top, right, right midline, and left midline. Note that  
499 for both systems the regions in the temporal lobes most frequently had the maximum SNR for the  
500 identified IEDs, consistent with SEEG, EEG, and earlier clinical MEG findings (see Table 1).  
501

502 For patient #2 no IEDs were identified in either the OPM (four 15-minute recordings  
503 with OPMs over the left or right hemisphere) or SQUID data.  
504

505 The SQUID recordings for patient #3 showed small IEDs, with an average SNR of 3.93  
506  $\pm 0.35$ , over the right superior temporal/parietal lobe, often occurring in brief series  
507 (SWI = 6.76). Similar IEDs were visible on a single channel in three OPM datasets  
508 (average duration 907 sec, range 900-916 sec; SWI = 9.00; average SNR  $3.85 \pm 0.32$ ).  
509 For the 4<sup>th</sup> OPM-recording, this OPM had been moved to a new position (Figure S2),  
510 and IEDs could not be identified in this channel anymore. The difference between the  
511 SNR of the IEDs in the OPM data and SQUID data was negligible (3.85 versus 3.93;  
512  $U = -2.86$ ,  $d = -0.14$ ,  $p = .0043$ ).  
513

514 For patient #4, six OPM-recordings, with an average duration of 348 sec (range: 194-  
515 614 sec), were performed with the OPMs over the right sensorimotor cortex. 282 IEDs  
516 were identified (SWI = 11.03). The four SQUID-recordings revealed more IEDs (SWI  
517 = 24.50), with significantly higher SNR and medium effect size (4.39 versus 4.05;  $U =$   
518  $9.53$ ,  $d = -0.36$ ,  $p = 2e-21$ ). Figure 3 shows the field configuration for IEDs recorded  
519 with both systems, illustrating that the topography is comparable across systems.  
520

521 For patient #5, no IEDs were identified in either the OPM (7 recordings; on average  
522 465 sec; range 307-631 sec) or SQUID data.  
523

524 For patient #6, six OPM-recordings were performed with the OPMs over the right  
525 central areas/superior temporal lobe. Two datasets, with a duration of 900 and 609 sec,  
526 contained 3 and 5 IEDs, respectively, with an average SNR of 6.15. The other datasets  
527 (601, 540, 884, and 173 sec in duration) did not contain IEDs, nor did the four 15-min  
528 SQUID recordings. As was the case in the previously recorded clinical MEG, the  
529 SQUID data contained artefacts in right-temporal channels due to orthodontic material

530 in the right side of the mouth, but these artefacts were largely removed by tSSS. In the  
531 OPM data, artefacts due to movement alone and those due to the orthodontic material  
532 were difficult to discern, but these were largely reduced by HFC.

533

534 After 2.5 hours, patient #7 had a seizure that was recorded with the OPM-system. The  
535 semiology was indicative of an onset in the left temporal lobe, or with a right temporal  
536 onset with rapid propagation to the left temporal lobe (see Table 1 and Supplementary  
537 Material). The seizure onset was visible in OPM sensors over both the left and right  
538 anterior temporal lobe, with no identifiable delay between the two hemispheres (Figure  
539 5). At source-level, seizure activity was visible in both hemispheres (Figure S3).  
540 Despite the large amplitude movements of the patient during the seizure, approximately  
541 30-40 cm, the OPMs stayed within their dynamic range (not shown), albeit with large  
542 movement-artefacts. Interictally, independent IEDs were observed over left and right  
543 temporal lobes, as well as simultaneously over both temporal lobes (Figure S4),  
544 consistent with the findings from earlier sEEG recordings and seizure semiology, which  
545 pointed at independent SOZs in the left and right temporal lobe, as well as occasional  
546 rapid propagation of ictal activity between these regions. Of note, in the previously  
547 recorded SQUID-MEG IEDs were found in right fronto-temporal regions, including  
548 frontobasal and insula, but no IEDs were found in the left hemisphere. SQUID  
549 recordings were not performed during the current visit.

550 Based on the semiology of the recorded seizure and the striking resemblance  
551 with activity for seizures of Type 1 as previously recorded using video-EEG and sEEG  
552 (Figure S3), the OPM data was consistent with a left temporal ictal onset and  
553 propagation, or right temporal ictal onset with rapid propagation to the left temporal  
554 lobe and further left temporal propagation.

555

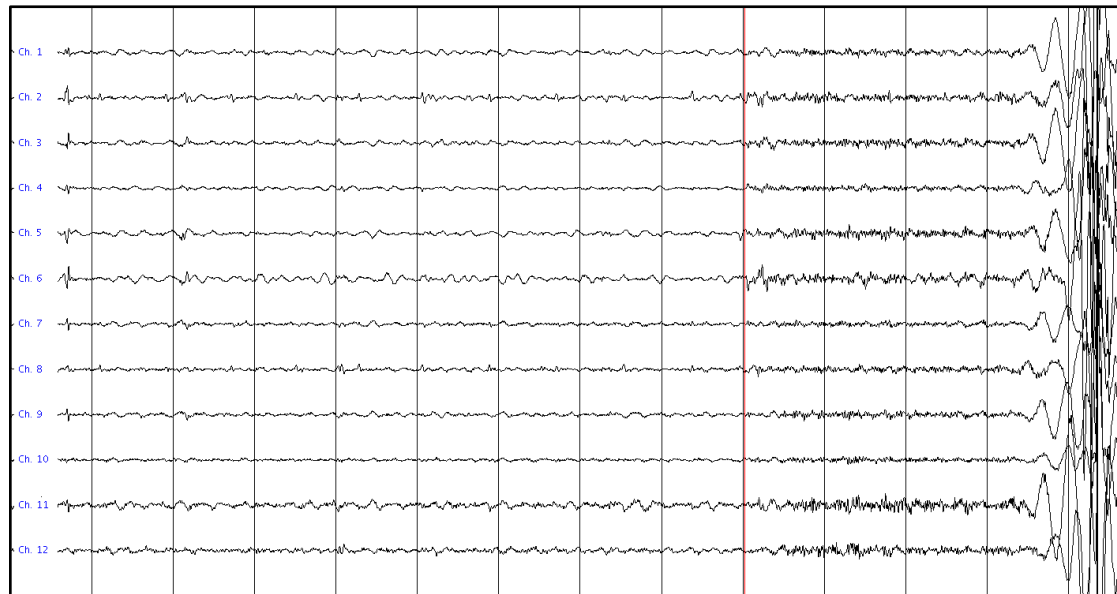

556  
557 **Figure 5: Ictal onset for patient #7.** The first and last 6 channels are from the 3 OPMs over the right  
558 and left anterior temporal lobe, respectively, with alternating channels recording in the OPMs' By and  
559 Bz direction (which is, in this case, in the anterior-posterior direction and approximately perpendicular  
560 to the scalp (inwards), respectively). The grey vertical lines mark 1 second of data, that were filtered  
561 between 3 - 48 Hz. Note the increase in fast activity, simultaneously over both hemispheres, after about  
562 9 secs, marking the start of the seizure (red vertical line). This is followed by artefacts due to movement  
563 during the seizure. Although it cannot be ruled-out that the fast activity during the 3 secs before the bodily  
564 movements was due to muscle activity, we believe that this is unlikely as the clinical onset of the seizure  
565 (blinking) started ~2 seconds after the onset of the fast activity (see Supplementary Material), and no  
566 other movements were discernible during that period (compare also with video-EEG recording in  
567 Supplementary Material).

568

569

#### 570 **4. Discussion**

571 The main aim of this study was to demonstrate the feasibility of OPM-based MEG in a  
572 clinical population. We showed that interictal epileptiform activity can be successfully  
573 recorded from both adults and children with epilepsy, and that seizure activity can also  
574 be captured. To demonstrate the advantages of a reduced source-sensor distance with  
575 OPMs we quantified and compared the SNR and IED yield with a conventional  
576 SQUID-based whole-helmet system. In one patient the OPMs detected IEDs that were  
577 not found with the SQUID-system. In one patient the spike yield was higher for the  
578 OPM data, with negligible difference in SNR compared to the SQUID data. This was  
579 also the case for a patient with a spike yield that was comparable to that for the SQUID  
580 data (after accounting for unilateral coverage with the OPMs). For one patient the spike  
581 yield and SNR were both lower for the OPMs. In two patients no IEDs were found with  
582 either system. Importantly, the wearability of OPMs enabled the recording of seizure  
583 activity in a patient with hyperkinetic movements during the seizure. The observed ictal  
584 onset and semiology was in agreement with previous video- and stereo-EEG



585 recordings. The ability to record seizures non-invasively, with high spatial resolution,  
586 is of clinical importance, as ictal activity often provides more accurate information  
587 about the epileptogenic zone than interictal activity (Stefan and Rampp, 2020). A more  
588 accurate delineation of the epileptogenic zone may improve surgical planning and  
589 ultimately lead to improved seizure outcome in patients with refractory epilepsy.

590

### 591 *Comparison between systems*

592 The noise level of OPMs (7-13 fT/ $\sqrt{\text{Hz}}$  in our case) is higher than for SQUIDS (~3  
593 fT/ $\sqrt{\text{Hz}}$ ), yet this is compensated for by the increase in signal amplitude due to the on-  
594 scalp placement of OPMs (reducing the source-sensor distance by ~2 cm compared to  
595 fixed-helmet SQUID-based systems). Simulations (Boto et al., 2016; Iivanainen et al.,  
596 2017) and experimental data (Boto et al., 2017; Feys et al., 2022) have shown that the  
597 SNR of OPM-based measurements is indeed higher than for SQUID-based recordings.  
598 The largest gains are found for cortical sources, as the relative reduction in source-  
599 sensor distance is larger there than for deeper brain structures. In line with these  
600 observations, OPMs outperformed SQUIDS for two of the four patients with IEDs, with  
601 either a higher spike yield, or an ability to detect IEDs that were not observable in the  
602 SQUID data. For three patients the SNRs of IEDs were (slightly) lower in the OPM  
603 data than in the SQUID data, but with negligible effect sizes for two of these patients.  
604 Recording along two axes with the OPMs could be a contributing factor here, as this  
605 results in a slight reduction in sensitivity (~30% reported by Osborne et al. (2018), but  
606 less by Rea et al. (2022)). A further possible explanation for this finding could be an  
607 insufficient coverage by the limited number of OPMs used in this study. This would  
608 particularly be an issue when an extended epileptogenic network is involved, which  
609 clinical MEG and sEEG recordings had previously shown for patient #1 (Table 1). That  
610 is, some of the IEDs in the extended network, or their field extrema, could have been  
611 missed by the small number of OPMs: the field maps for on-scalp sensors are much  
612 more confined than for SQUID-based systems due to the reduced source-sensor  
613 distance (see e.g. Boto et al. (2016)), such that IEDs' sensor-level signatures can be  
614 easily missed, or be reduced in amplitude, when OPMs are not optimally placed. In  
615 other words, on-scalp OPM arrays have more focal fields-of-view (Iivanainen et al.,  
616 2017), implying that a more exact placement with respect to the underlying sources is  
617 required. It also means that with equal SNR, OPMs still offer higher spatial resolution  
618 than SQUIDS. Another explanation could be in the origin of the IEDs, which in patient

619 #1 was in mesial temporal structures, for which the decreased source-sensor distance  
620 does not fully outweigh the decreased sensitivity of the OPMs compared to the SQUIDS  
621 (Boto et al., 2016). This could be remedied in future recordings by increasing the  
622 number of OPMs, including placement of OPMs over basal areas, and/or against the  
623 roof of the mouth (Tierney et al., 2021b).

624 Somewhat surprisingly, given the superficial origin of the IEDs, the average  
625 SNR of IEDs in patient #3 was comparable between the two systems. However, the  
626 SNR of the IEDs was low for both systems, and more IEDs were observed with the  
627 OPMs than with the SQUIDS. The inclusion of more, low-amplitude, IEDs reduced the  
628 average SNR for the IEDs in the OPM data. This would lead to the conclusion that the  
629 OPMs actually outperformed the SQUIDS, by their ability to detect such weak IEDs.  
630 However, sensor placement also had a big effect on the detectability of IEDs in this  
631 patient, as displacement of one OPM by 2.8 cm (Figure S2) made the IEDs  
632 undetectable. Another explanation for the findings could therefore be that the SNR was,  
633 also in this patient, reduced by sub-optimal placement of the OPMs. This is also the  
634 most likely explanation for the observed lower SNR for OPMs compared to SQUIDS  
635 for patient #4, who also had IEDs with a superficial origin (Table 1, Figure 3). It should  
636 be noted that even though the SNR differed significantly for this patient, due to the  
637 large number of IEDs, the actual difference in SNR was small (i.e. within the standard  
638 deviation of the SNR for the individual systems), with a medium effect size.

639

640 For patient #4, the spike yield was lower for the OPM data than for the SQUID  
641 data. This could potentially be explained by state-changes, as the OPM data were  
642 recorded in the morning and the SQUID data after lunch. This, in combination with the  
643 sleep-deprivation and the difference in patient-positioning (seated versus supine),  
644 resulted in a notable increase in drowsiness in the SQUID-session, which may have  
645 affected the yield of MEG abnormalities (Leach et al., 2006). Similarly, within a single  
646 session the IED yield could vary over time as well: for patient #3, for example, the first  
647 two (out of four) SQUID-recordings contained most of the IEDs. Unfortunately, the  
648 size of the OPMs, as well as the proximity of the cold-head, did not allow for a  
649 simultaneous recording with both systems. The spike yield could also have been  
650 artificially lowered in the OPM data due to movements. Movement-artefacts may have  
651 obscured IEDs during periods of movement. The patients had more freedom to move  
652 during the OPM recordings than during the (supine) SQUID recordings.

653 Unexpectedly, no IEDs could be found for patients #2 and #5 with either system.  
654 Patient #2 showed clear IEDs in both temporal lobes in the clinical MEG data that were  
655 recorded two and a half years prior to the current recordings, as well as in the stereo-  
656 EEG from 2 years ago. After the stereo-EEG the seizure frequency reduced, and the last  
657 seizure was a year ago, which may explain the absence of interictal activity in the  
658 current recordings. In the clinical MEG recordings of patient #5 from nearly 4 years  
659 ago there were clear spikes and polyspikes, and seizures remained, hence we do not  
660 have an explanation for the absence of IEDs in the current recordings.

661

### 662 Seizure recordings

663 We demonstrated that seizure activity can be successfully recorded. The wearability of  
664 the sensors opens up the possibility for long-term observations, although to capture  
665 seizures in unselected patients one often has to record continuously for many days, as  
666 is done in an Epilepsy Monitoring Unit. Currently, even with a wearable OPM-based  
667 device, the recordings are restricted to the MSR due to the limited dynamic range of the  
668 OPMs, which limits the total length of a recording session. The dynamic range can be  
669 increased though by operating the OPMs in closed-loop (Fourcault et al., 2021), and by  
670 using alternative OPMs that do not rely on near-zero fields and that have a much larger  
671 dynamic range. Such sensors have already shown promise for the recording of MEG  
672 activity, even in an unshielded environment (Zhang et al., 2020). These developments  
673 could ultimately lead to long-term wearable MEG recordings in an unshielded  
674 environment, potentially removing the need for invasive stereo-EEG recordings.

675

### 676 Future perspectives: increasing signal quality

677 Ictal MEG with SQUID-based systems is feasible for selected patients (see Stefan and  
678 Rampp (2020) for a review), namely those without (hyperkinetic) movements during  
679 the onset of their seizures. With OPMs the fixation to the scalp means that the  
680 movement restrictions are less severe, although movement of the OPMs through the  
681 remnant field-gradients still induces movement-artefacts (Figure 5). However, as long  
682 as the OPMs stay within their dynamic range so that the neuronal activity is captured  
683 alongside the artefacts, there is the possibility of recovering the signals of interest. We  
684 envisage that the increased spatial sampling with whole-head OPM coverage can be  
685 leveraged to achieve this, for example using beamforming. Seymour and colleagues  
686 have recently shown that straightforward pre-processing, involving the regression of

687 motion-captured movement-parameters from OPM-recordings (removing artefacts  
688  $<0.5$  Hz) and HFC (effectively the removal of the lower order external noise terms from  
689 SSS, removing artefacts 0-10 Hz), in combination with beamforming, allowed for  
690 movements of at least 1 meter (Seymour et al., 2021). It may be possible to improve on  
691 this by generating a model of the remnant fields inside the MSR, and using this model  
692 to predict and remove movement-related artefacts (Mellor et al., 2022). Moreover,  
693 reducing the field gradients in custom-designed MSRs with degaussing coils (Altarev  
694 et al., 2015), or by using field-nulling ‘matrix-coils’ that allow for accurate field control  
695 in a large volume (Holmes et al., 2021), would reduce the amplitude of movement-  
696 related artefacts to begin with. Finally, closed-loop designs can be used to further  
697 reduce movement-related artefacts, either at the OPM-level using a feedback signal to  
698 drive the on-board coils (requiring tri-axial sensitivity (Rea et al., 2022)), or through  
699 the field-nulling coils by ‘real-time’ updating of the coil calibration matrix, which  
700 would ensure optimal field cancellation during movements. With such technical  
701 developments, the increased SNR of OPMs (Boto et al., 2016; Boto et al., 2017;  
702 Iivanainen et al., 2017) could be utilised to its full extent to accurately localise the SOZ  
703 non-invasively. A key attraction of OPMs compared to SQUID systems is the flexibility  
704 of sensor placement, and the ability to detect and localise the SOZ in the (mesial)  
705 temporal lobe with OPMs could be further increased by strategic placement of the  
706 sensors (Tierney et al., 2021b).

707

#### 708 *Future perspectives: helmet design*

709 Bespoke rigid sensor arrays were created for all patients in this study, based on the  
710 individual anatomical MRI, with sensor placement based on the field maps of IEDs that  
711 had been identified in the previously recorded clinical MEG, in combination with  
712 information from stereo-EEG recordings (in the adult patients). However, no further  
713 optimisation of sensor placement was performed (Beltrachini et al., 2021; Iivanainen et  
714 al., 2021; Riaz et al., 2017). Particularly for systems with a limited number of sensors,  
715 the exact location of the sensors with respect to a region of interest becomes more  
716 important (Iivanainen et al., 2021). As mentioned above, the field maps generated for  
717 on-scalp sensors are quite compact, and local dense non-uniform sampling yields more  
718 information than uniform sampling of a larger area (Iivanainen et al., 2021). In future  
719 clinical studies, strong prior information about the expected generators of IEDs and  
720 ictal activity may not be available, rendering such an approach impractical. However,

721 we envisage that multi-channel OPM-based systems with 50+ sensors and whole-head  
722 coverage (Hill et al., 2022) will become the norm. For such systems, uniform sampling  
723 may be sufficient, as long as the sensor spacing is approximately equal to the distance  
724 of the sensors to the closest source (Iivanainen et al., 2021). When using triaxial sensors,  
725 75-100 uniformly placed sensors would provide sufficient spatial sampling (Tierney et  
726 al., 2022). It is still an open question what the optimal helmet design would be for larger  
727 clinical studies. Bespoke 3D-printed helmets are optimal in the sense that the sensors  
728 are fixed at known locations and with known orientations, yet their construction is time-  
729 consuming and costly. Flexible caps on the other hand can be re-used, but recordings  
730 may be more noisy due to sensor movements/rotations, and the exact sensor locations  
731 and orientations need to be determined. A compromise may be the use of a limited  
732 number of different-sized rigid helmets, with holders in which OPMs can be pressed  
733 onto the scalp (Zetter et al., 2019). The depth of the OPMs within their holder could be  
734 measured manually, or sensor positions and orientations could be determined  
735 automatically, using either an optical approach (Gu et al., 2021) or utilising the field-  
736 nulling coils (Iivanainen et al., 2022). The latter approach has the advantage that any  
737 changes in the orientations of the OPM's sensitive axes due to crosstalk from  
738 neighbouring OPMs are already taken into account. These automatic approaches could  
739 also be used in combination with a design consisting of a bespoke rigid base to which  
740 a generic flexible cap with OPM-holders can be attached  
741 (<https://qusp.in.com/experimental-meg-cap/>).

742

#### 743 *Limitations on the number of OPMs*

744 An obvious limitation of this proof-of-principal study is the limited number of OPM  
745 sensors. By including well-characterised patients who had already undergone a  
746 successful clinical MEG that revealed IEDs that could be localised, as well as stereo-  
747 EEG (for the adult patients), we were able to increase the chances of capturing IEDs  
748 through strategic placement of the OPMs. However, despite this imbalance in the  
749 number of sensors (6 sensors/12 channels versus 102 sensors/306 channels), the OPM  
750 system performed as well as, if not better than, the SQUID-based system in terms of  
751 IED yield and/or SNR.

752

#### 753 *Limitations on differences in recording conditions and data processing*

754 Other factors that could have affected the direct comparison between the two systems  
755 include differences in pre-processing (HFC versus SSS), head modelling (single shell  
756 versus single sphere) and beamformer implementation (DAiSS versus Elekta  
757 beamformer), as well as the differences between recording sessions mentioned above  
758 (time-of-day, seated versus supine).

759

### 760 Limitations on identification of IEDs

761 Interictal epileptiform discharges were primarily identified on the basis of visual  
762 inspection by an experienced EEG/MEG technician. A straightforward automatic  
763 algorithm that identified brief, sharp events that clearly stood out from the baseline (i.e.  
764 had a high Z-score), was used to identify other potential IEDs that were missed on visual  
765 inspection. Due to its simplicity, our automatic detector gave many false positives when  
766 the Z-score threshold was chosen such that (most) true positives were not missed, and  
767 careful visual assessment of the identified potential IEDs was therefore still required.  
768 For example, in the sensor-level SQUID data the algorithm initially locked-on to a  
769 strong ECG artefact that was present in some channels in some of the patients. This  
770 problem was mitigated by using only a sub-selection of channels for the automatic IED  
771 identification. Similarly, some IEDs that had been visually identified were missed by  
772 the automatic detector (false negatives) because of the IED-morphology. The data from  
773 patient #1 in particular contained polyspikes/spike-wave discharges that were  
774 sometimes missed by the detector, as were some small spikes for patient #3. Use of  
775 more sophisticated algorithms for the identification of interictal abnormalities (e.g. da  
776 Silva Lourenço et al. (2021); Kural et al. (2022)) would ease the objective comparison  
777 of the performance of both MEG systems, yet this was beyond the scope of the current  
778 manuscript.

779 A recent study showed that with the aid of artificial intelligence it is even possible  
780 to detect hippocampal epileptiform activity in the scalp EEG (Abou Jaoude et al., 2022).  
781 Simultaneous recordings of OPM- and EEG-data would enable a direct comparison  
782 between the two modalities regarding their ability to identify hippocampal IEDs.  
783 Although this is feasible (Ru et al., 2022), it also provides considerable engineering  
784 challenges, such as placement of the sensors/electrodes and how they may affect each  
785 other. Except for patient #7, we did not perform a direct comparison between the OPM  
786 data and the EEG, stereo-EEG and/or MEG data that had been recorded previously, for  
787 several reasons: i) the interval between these recordings was considerable (from half a

788 year to several years), during which aging, changes in medication, or other factors could  
789 have affected the interictal activity; ii) such a comparison, for example in terms of IED-  
790 yield, would have been biased, since OPM-placement was based on these previous  
791 recordings. It is therefore not surprising that the OPM-results, for those patients with  
792 epileptiform activity in their OPM data, were in agreement with earlier EEG, stereo-  
793 EEG and/or MEG (see Table 1).

794

#### 795 Limitations on the statistical approach

796 For the statistical comparison of the SNR of the IEDs as obtained with the OPMs and  
797 SQUIDS a Mann-Whitney U-test was used. Hence, we used the assumption that the  
798 observations between the separate recordings were independent (since the recordings  
799 were performed at different times, and the IEDs themselves could therefore have  
800 changed over time). This is a conservative approach though, and one could increase  
801 statistical power by taking into account that the within-patient observations were not  
802 completely independent, for example through mixed-effects modelling (DeHart and  
803 Kaplan, 2019).

804

805

#### 806 **5. Conclusions**

807 We have shown that interictal epileptiform activity can be reliably recorded with OPM-  
808 MEG, both in adults and paediatric populations. Moreover, the wearability of the  
809 sensors allowed for seizure recordings, even in the presence of significant movement.  
810 Overall, OPM data were very much comparable to those obtained with a cryogenic  
811 system, despite a potential lowering of the SNR of the IEDs due to suboptimal  
812 placement of the limited number of sensors. The relatively low cost of this technology,  
813 in combination with its reduced running and maintenance costs, means that OPM-based  
814 MEG could be used more widely than is the case with current MEG systems, and it may  
815 become an affordable alternative to scalp EEG, with the potential benefits of increased  
816 spatial accuracy, reduced sensitivity to volume conduction/field spread, and increased  
817 sensitivity to deep sources such as the hippocampus. Given its patient-friendliness, we  
818 envisage that wearable MEG will in the near future not only be used for presurgical  
819 evaluation of epilepsy patients, but also for diagnosis after a first seizure.

## 820 **6. Acknowledgements**

821 We acknowledge the valuable contribution to this study by:  
822 the participants, and their parents, for taking part; Ilse van Straaten, Hanneke Ronner,  
823 Maeike Zijlmans, Kees Braun, and Floor Jansen for help with patient inclusion; the  
824 Development Team at the VUmc for construction of the field-nulling coils, Petteri  
825 Laine for construction of the cold-head compensation coils, and Mika Pajula and  
826 Rasmus Zetter for development of the filter unit for the cold-head compensation coils;  
827 Matthijs Grimbergen for development of the OPM-helmets; Annetje Guédon and  
828 Matthijs Grimbergen for development of system validation protocols; Peterjan Ris,  
829 Hans van der Horst, Theo Hillebrand, Prejaas Tewarie, James Osborne, and Vishal Shah  
830 for technical assistance; Anne van Nifterick, Francesco Galmozzi, Ida Nissen, Deborah  
831 Schoonhoven, Lennard Boon, Nandy Zwagerman, Nienke Scheltens, Nico Akemann,  
832 and Peterjan Ris for wiring of the field-nulling coils.

833

834

## 835 **7. Funding**

836 This work was supported by the Dutch Epilepsy Foundation, project number EC19-05.

837

838

## 839 **8. Data Availability**

840 Data and user-developed codes are available upon reasonable request to the  
841 corresponding author under the condition of an existing collaboration agreement.

842

843

## 844 **9. Competing Interests**

845 M.J.B. is a director of Cerca Magnetics Limited, a spin-out company whose aim is to  
846 commercialise aspects of OPM-MEG technology. Cerca products include bi-planar  
847 coils such as those used in this work. N.H., M.J.B. and R.B. hold founding equity in  
848 Cerca Magnetics Limited, and N.H. and R.B. sit on the scientific advisory board.



849 **10. CRediT authorship contribution statement**

850 **Arjan Hillebrand:** Conceptualization, Data curation, Formal analysis, Funding  
851 acquisition, Investigation, Methodology, Project administration, Resources, Software,  
852 Supervision, Validation, Visualization, Writing - original draft. **Niall Holmes:**  
853 Methodology, Resources, Software, Writing - review & editing. **Ndedi Sijsma:**  
854 Investigation. **George C. O'Neill:** Methodology, Software, Writing - review & editing.  
855 **Tim M. Tierney:** Methodology, Software, Writing - review & editing. **Niels Liberton:**  
856 Methodology, Resources. **Anine H. Stam:** Resources, Validation, Writing - review &  
857 editing. **Nicole van Klink:** Funding acquisition, Resources, Validation, Writing -  
858 review & editing. **Cornelis J. Stam:** Funding acquisition, Methodology, Resources,  
859 Software, Writing - review & editing. **Richard Bowtell:** Funding acquisition, Writing  
860 - review & editing. **Matthew J. Brookes:** Funding acquisition, Writing - review &  
861 editing. **Gareth R. Barnes:** Conceptualization, Funding acquisition, Methodology,  
862 Writing - review & editing.

## 863 11. References

- 864 Abou Jaoude, M., Jacobs, C.S., Sarkis, R.A., Jing, J., Pellerin, K.R., Cole, A.J., Cash,  
865 S.S., Westover, M.B., Lam, A.D., 2022. Noninvasive Detection of Hippocampal  
866 Epileptiform Activity on Scalp Electroencephalogram. *JAMA Neurol* 79, 614-  
867 622.
- 868 Adjamian, P., Worthen, S.F., Hillebrand, A., Furlong, P.L., Chizh, B.A., Hobson, A.R.,  
869 Aziz, Q., Barnes, G.R., 2009. Effective electromagnetic noise cancellation with  
870 beamformers and synthetic gradiometry in shielded and partly shielded  
871 environments. *J. Neurosci. Methods* 178, 120-127.
- 872 Aeby, A., Santalucia, R., Van Hecke, A., Nebbioso, A., Vermeiren, J., Deconinck, N.,  
873 De Tiège, X., Van Bogaert, P., 2021. A qualitative awake EEG score for the  
874 diagnosis of continuous spike and waves during sleep (CSWS) syndrome in self-  
875 limited focal epilepsy (SFE): A case-control study. *Seizure* 84, 34-39.
- 876 Alem, O., Benison, A.M., Barth, D.S., Kitching, J., Knappe, S., 2014.  
877 Magnetoencephalography of epilepsy with a microfabricated atomic  
878 magnetode. *J Neurosci* 34, 14324-14327.
- 879 Altarev, I., Fierlinger, P., Lins, T., Marino, M.G., Nießen, B., Petzoldt, G., Reisner, M.,  
880 Stuiber, S., Sturm, M., Singh, J.T., Taubenheim, B., Rohrer, H.K., Schläpfer,  
881 U., 2015. Minimizing magnetic fields for precision experiments. *Journal of*  
882 *Applied Physics* 117, 233903.
- 883 Bekelis, K., Desai, A., Kotlyar, A., Thadani, V., Jobst, B.C., Bujarski, K., Darcey, T.M.,  
884 Roberts, D.W., 2013. Occipitotemporal hippocampal depth electrodes in  
885 intracranial epilepsy monitoring: safety and utility. *J. Neurosurg* 118, 345-352.
- 886 Beltrachini, L., von Ellenrieder, N., Eichardt, R., Haueisen, J., 2021. Optimal design of  
887 on-scalp electromagnetic sensor arrays for brain source localisation. *Hum Brain*  
888 *Mapp* 42, 4869-4879.
- 889 Borna, A., Carter, T.R., Colombo, A.P., Jau, Y.Y., McKay, J., Weisend, M., Taulu, S.,  
890 Stephen, J.M., Schwindt, P.D.D., 2020. Non-Invasive Functional-Brain-  
891 Imaging with an OPM-based Magnetoencephalography System. *PLoS One* 15,  
892 e0227684.
- 893 Borna, A., Iivanainen, J., Carter, T.R., McKay, J., Taulu, S., Stephen, J., Schwindt,  
894 P.D.D., 2022. Cross-Axis projection error in optically pumped magnetometers  
895 and its implication for magnetoencephalography systems. *NeuroImage* 247,  
896 118818.
- 897 Boto, E., Bowtell, R., Kruger, P., Fromhold, T.M., Morris, P.G., Meyer, S.S., Barnes,  
898 G.R., Brookes, M.J., 2016. On the Potential of a New Generation of  
899 Magnetometers for MEG: A Beamformer Simulation Study. *PLoS One* 11,  
900 e0157655.
- 901 Boto, E., Hill, R.M., Rea, M., Holmes, N., Seedat, Z.A., Leggett, J., Shah, V., Osborne,  
902 J., Bowtell, R., Brookes, M.J., 2021. Measuring functional connectivity with  
903 wearable MEG. *NeuroImage* 230, 117815.
- 904 Boto, E., Holmes, N., Leggett, J., Roberts, G., Shah, V., Meyer, S.S., Munoz, L.D.,  
905 Mullinger, K.J., Tierney, T.M., Bestmann, S., Barnes, G.R., Bowtell, R.,  
906 Brookes, M.J., 2018. Moving magnetoencephalography towards real-world  
907 applications with a wearable system. *Nature* 555, 657-661.
- 908 Boto, E., Meyer, S.S., Shah, V., Alem, O., Knappe, S., Kruger, P., Fromhold, T.M.,  
909 Lim, M., Glover, P.M., Morris, P.G., Bowtell, R., Barnes, G.R., Brookes, M.J.,  
910 2017. A new generation of magnetoencephalography: Room temperature  
911 measurements using optically-pumped magnetometers. *NeuroImage* 149, 404-  
912 414.

- 913 Boto, E., Seedat, Z.A., Holmes, N., Leggett, J., Hill, R.M., Roberts, G., Shah, V.,  
914 Fromhold, T.M., Mullinger, K.J., Tierney, T.M., Barnes, G.R., Bowtell, R.,  
915 Brookes, M.J., 2019. Wearable neuroimaging: Combining and contrasting  
916 magnetoencephalography and electroencephalography. *NeuroImage* 201,  
917 116099.
- 918 Brookes, M.J., Boto, E., Rea, M., Shah, V., Osborne, J., Holmes, N., Hill, R.M.,  
919 Leggett, J., Rhodes, N., Bowtell, R., 2021. Theoretical advantages of a triaxial  
920 optically pumped magnetometer magnetoencephalography system. *NeuroImage*  
921 236, 118025.
- 922 Brookes, M.J., Leggett, J., Rea, M., Hill, R.M., Holmes, N., Boto, E., Bowtell, R., 2022.  
923 Magnetoencephalography with optically pumped magnetometers (OPM-MEG):  
924 the next generation of functional neuroimaging. *Trends Neurosci* 45, 621-634.
- 925 Cheyne, D., Bakhtzad, L., Gaetz, W., 2006. Spatiotemporal mapping of cortical  
926 activity accompanying voluntary movements using an event-related  
927 beamforming approach. *Hum. Brain Mapp* 27, 213-229.
- 928 Colombo, A.P., Carter, T.R., Borna, A., Jau, Y.Y., Johnson, C.N., Dagel, A.L.,  
929 Schwindt, P.D., 2016. Four-channel optically pumped atomic magnetometer for  
930 magnetoencephalography. *Opt Express* 24, 15403-15416.
- 931 Colon, A.J., Ossenblok, P., Nieuwenhuis, L., Stam, K.J., Boon, P., 2009. Use of routine  
932 MEG in the primary diagnostic process of epilepsy. *J Clin Neurophysiol* 26,  
933 326-332.
- 934 da Silva Lourenço, C., Tjepkema-Cloostermans, M.C., van Putten, M., 2021. Machine  
935 learning for detection of interictal epileptiform discharges. *Clin Neurophysiol*  
936 132, 1433-1443.
- 937 de Lange, P., Boto, E., Holmes, N., Hill, R.M., Bowtell, R., Wens, V., De Tiege, X.,  
938 Brookes, M.J., Bourguignon, M., 2021. Measuring the cortical tracking of  
939 speech with optically-pumped magnetometers. *NeuroImage* 233, 117969.
- 940 DeHart, W.B., Kaplan, B.A., 2019. Applying mixed-effects modeling to single-subject  
941 designs: An introduction. *J Exp Anal Behav* 111, 192-206.
- 942 Dupont-Roc, J., Haroche, S., Cohen-Tannoudji, C., 1969. Detection of very weak  
943 magnetic fields (10–9gauss) by <sup>87</sup>Rb zero-field level crossing resonances.  
944 *Physics Letters A* 28, 638-639.
- 945 Fan, L., Li, H., Zhuo, J., Zhang, Y., Wang, J., Chen, L., Yang, Z., Chu, C., Xie, S.,  
946 Laird, A.R., Fox, P.T., Eickhoff, S.B., Yu, C., Jiang, T., 2016. The Human  
947 Brainnetome Atlas: A New Brain Atlas Based on Connectional Architecture.  
948 *Cereb Cortex* 26, 3508-3526.
- 949 Feys, O., Corvilain, P., Aeby, A., Sculier, C., Holmes, N., Brookes, M., Goldman, S.,  
950 Wens, V., De Tiège, X., 2022. On-Scalp Optically Pumped Magnetometers  
951 versus Cryogenic Magnetoencephalography for Diagnostic Evaluation of  
952 Epilepsy in School-aged Children. *Radiology*, 212453.
- 953 Fourcault, W., Romain, R., Le Gal, G., Bertrand, F., Josselin, V., Le Prado, M., Labyt,  
954 E., Palacios-Laloy, A., 2021. Helium-4 magnetometers for room-temperature  
955 biomedical imaging: toward collective operation and photon-noise limited  
956 sensitivity. *Opt Express* 29, 14467-14475.
- 957 Gu, W., Ru, X., Li, D., He, K., Cui, Y., Sheng, J., Gao, J.H., 2021. Automatic  
958 coregistration of MRI and on-scalp MEG. *J Neurosci Methods* 358, 109181.
- 959 Hill, R.M., Boto, E., Holmes, N., Hartley, C., Seedat, Z.A., Leggett, J., Roberts, G.,  
960 Shah, V., Tierney, T.M., Woolrich, M.W., Stagg, C.J., Barnes, G.R., Bowtell,  
961 R., Slater, R., Brookes, M.J., 2019. A tool for functional brain imaging with  
962 lifespan compliance. *Nature Communications* 10, 4785.

- 963 Hill, R.M., Devasagayam, J., Holmes, N., Boto, E., Shah, V., Osborne, J., Safar, K.,  
964 Worcester, F., Mariani, C., Dawson, E., Woolger, D., Bowtell, R., Taylor, M.J.,  
965 Brookes, M.J., 2022. Using OPM-MEG in contrasting magnetic environments.  
966 *NeuroImage* 253, 119084.
- 967 Hillebrand, A., Barnes, G.R., 2002. A quantitative assessment of the sensitivity of  
968 whole-head meg to activity in the adult human cortex. *NeuroImage* 16, 638-650.
- 969 Hillebrand, A., Barnes, G.R., 2005. Beamformer analysis of MEG data. *International*  
970 *Review of Neurobiology (Special volume on Magnetoencephalography)* 68,  
971 149-171.
- 972 Hillebrand, A., Barnes, G.R., Bosboom, J.L., Berendse, H.W., Stam, C.J., 2012.  
973 Frequency-dependent functional connectivity within resting-state networks: an  
974 atlas-based MEG beamformer solution. *NeuroImage* 59, 3909-3921.
- 975 Hillebrand, A., Fazio, P., de Munck, J.C., van Dijk, B.W., 2013. Feasibility of clinical  
976 magnetoencephalography (MEG) functional mapping in the presence of dental  
977 artefacts. *Clin Neurophysiol* 124, 107-113.
- 978 Hillebrand, A., Nissen, I.A., Ris-Hilgersom, I., Sijsma, N.C., Ronner, H.E., van Dijk,  
979 B.W., Stam, C.J., 2016a. Detecting epileptiform activity from deeper brain  
980 regions in spatially filtered MEG data. *Clin. Neurophysiol* 127, 2766-2769.
- 981 Hillebrand, A., Singh, K.D., Holliday, I.E., Furlong, P.L., Barnes, G.R., 2005. A new  
982 approach to neuroimaging with magnetoencephalography. *Human Brain*  
983 *Mapping* 25, 199-211.
- 984 Hillebrand, A., Tewarie, P., van, D.E., Yu, M., Carbo, E.W., Douw, L., Gouw, A.A.,  
985 van Straaten, E.C., Stam, C.J., 2016b. Direction of information flow in large-  
986 scale resting-state networks is frequency-dependent. *Proc. Natl. Acad. Sci. U.*  
987 *S. A* 113, 3867-3872.
- 988 Hipp, J.F., Siegel, M., 2015. Accounting for linear transformations of EEG and MEG  
989 data in source analysis. *PLoS One* 10, e0121048.
- 990 Holmes, N., Leggett, J., Boto, E., Roberts, G., Hill, R.M., Tierney, T.M., Shah, V.,  
991 Barnes, G.R., Brookes, M.J., Bowtell, R., 2018. A bi-planar coil system for  
992 nulling background magnetic fields in scalp mounted magnetoencephalography.  
993 *NeuroImage* 181, 760-774.
- 994 Holmes, N., Rea, M., Hill, R.M., Boto, E., Stuart, A., Leggett, J., Edwards, L.J., Rhodes,  
995 N., Shah, V., Osborne, J., Fromhold, T.M., Glover, P., Montague, P.R., Brookes,  
996 M.J., Bowtell, R., 2021. Naturalistic hyperscanning with wearable  
997 magnetoencephalography. *bioRxiv*, 2021.2009.2007.459124.
- 998 Holmes, N., Tierney, T.M., Leggett, J., Boto, E., Mellor, S., Roberts, G., Hill, R.M.,  
999 Shah, V., Barnes, G.R., Brookes, M.J., Bowtell, R., 2019. Balanced, bi-planar  
1000 magnetic field and field gradient coils for field compensation in wearable  
1001 magnetoencephalography. *Scientific Reports* 9, 14196.
- 1002 Iivanainen, J., Borna, A., Zetter, R., Carter, T.R., Stephen, J.M., McKay, J., Parkkonen,  
1003 L., Taulu, S., Schwindt, P.D.D., 2022. Calibration and Localization of Optically  
1004 Pumped Magnetometers Using Electromagnetic Coils. *Sensors (Basel)* 22.
- 1005 Iivanainen, J., Makinen, A.J., Zetter, R., Stenroos, M., Ilmoniemi, R.J., Parkkonen, L.,  
1006 2021. Spatial sampling of MEG and EEG based on generalized spatial-  
1007 frequency analysis and optimal design. *NeuroImage* 245, 118747.
- 1008 Iivanainen, J., Stenroos, M., Parkkonen, L., 2017. Measuring MEG closer to the brain:  
1009 Performance of on-scalp sensor arrays. *NeuroImage* 147, 542-553.
- 1010 Iivanainen, J., Zetter, R., Gron, M., Hakkarainen, K., Parkkonen, L., 2019. On-scalp  
1011 MEG system utilizing an actively shielded array of optically-pumped  
1012 magnetometers. *NeuroImage* 194, 244-258.

- 1013 Iivanainen, J., Zetter, R., Parkkonen, L., 2020. Potential of on-scalp MEG: Robust  
1014 detection of human visual gamma-band responses. *Hum Brain Mapp* 41, 150-  
1015 161.
- 1016 Jehi, L., 2018. The Epileptogenic Zone: Concept and Definition. *Epilepsy currents* 18,  
1017 12-16.
- 1018 Knösche, T., 2002. Transformation of whole-head MEG recordings between different  
1019 sensor positions. *Biomedizinische Technik* 47, 59-62.
- 1020 Kural, M.A., Jing, J., Furbass, F., Perko, H., Qerama, E., Johnsen, B., Fuchs, S.,  
1021 Westover, M.B., Beniczky, S., 2022. Accurate identification of EEG recordings  
1022 with interictal epileptiform discharges using a hybrid approach: Artificial  
1023 intelligence supervised by human experts. *Epilepsia* 63, 1064-1073.
- 1024 Leach, J.P., Stephen, L.J., Salveta, C., Brodie, M.J., 2006. Which  
1025 electroencephalography (EEG) for epilepsy? The relative usefulness of different  
1026 EEG protocols in patients with possible epilepsy. *J Neurol Neurosurg Psychiatry*  
1027 77, 1040-1042.
- 1028 Luders, H.O., Najm, I., Nair, D., Widdess-Walsh, P., Bingman, W., 2006. The  
1029 epileptogenic zone: general principles. *Epileptic. Disord* 8 Suppl 2, S1-S9.
- 1030 Malow, B.A., 2004. Sleep deprivation and epilepsy. *Epilepsy currents* 4, 193-195.
- 1031 Marhl, U., Jodko-Wladzinska, A., Bruhl, R., Sander, T., Jazbinsek, V., 2022.  
1032 Transforming and comparing data between standard SQUID and OPM-MEG  
1033 systems. *PLoS One* 17, e0262669.
- 1034 Mégevand, P., Seeck, M., 2020. Electric source imaging for presurgical epilepsy  
1035 evaluation: current status and future prospects. *Expert Rev Med Devices* 17,  
1036 405-412.
- 1037 Mellor, S., Tierney, T.M., O'Neill, G.C., Alexander, N., Seymour, R.A., Holmes, N.,  
1038 Lopez, J.D., Hill, R.M., Boto, E., Rea, M., Roberts, G., Leggett, J., Bowtell, R.,  
1039 Brookes, M.J., Maguire, E.A., Walker, M.C., Barnes, G.R., 2022. Magnetic  
1040 Field Mapping and Correction for Moving OP-MEG. *IEEE Trans Biomed Eng*  
1041 69, 528-536.
- 1042 Najm, I., Jehi, L., Palmi, A., Gonzalez-Martinez, J., Paglioli, E., Bingaman, W., 2013.  
1043 Temporal patterns and mechanisms of epilepsy surgery failure. *Epilepsia* 54,  
1044 772-782.
- 1045 Nemtsas, P., Birot, G., Pittau, F., Michel, C.M., Schaller, K., Vulliemoz, S., Kimiskidis,  
1046 V.K., Seeck, M., 2017. Source localization of ictal epileptic activity based on  
1047 high-density scalp EEG data. *Epilepsia* 58, 1027-1036.
- 1048 Nissen, I.A., Stam, C.J., Citroen, J., Reijneveld, J.C., Hillebrand, A., 2016. Preoperative  
1049 evaluation using magnetoencephalography: Experience in 382 epilepsy patients.  
1050 *Epilepsy Res* 124, 23-33.
- 1051 Nolte, G., 2003. The magnetic lead field theorem in the quasi-static approximation and  
1052 its use for magnetoencephalography forward calculation in realistic volume  
1053 conductors. *Physics in Medicine and Biology* 48, 3637-3652.
- 1054 Nurminen, J., Taulu, S., Nenonen, J., Helle, L., Simola, J., Ahonen, A., 2013. Improving  
1055 MEG performance with additional tangential sensors. *IEEE Trans Biomed Eng*  
1056 60, 2559-2566.
- 1057 Osborne, J., Orton, J., Alem, O., Shah, V., 2018. Fully integrated, standalone zero field  
1058 optically pumped magnetometer for biomagnetism. In: Shahriar, S.M., Scheuer,  
1059 J., editors. *Steep Dispersion Engineering and Opto-Atomic Precision Metrology*  
1060 XI. San Francisco, United States: SPIE.
- 1061 Rampp, S., Stefan, H., Wu, X., Kaltenhauser, M., Maess, B., Schmitt, F.C., Wolters,  
1062 C.H., Hamer, H., Kasper, B.S., Schwab, S., Doerfler, A., Blumcke, I., Rossler,

- 1063 K., Buchfelder, M., 2019. Magnetoencephalography for epileptic focus  
1064 localization in a series of 1000 cases. *Brain* 142, 3059-3071.
- 1065 Rea, M., Boto, E., Holmes, N., Hill, R., Osborne, J., Rhodes, N., Leggett, J., Rier, L.,  
1066 Bowtell, R., Shah, V., Brookes, M.J., 2022. A 90-channel triaxial  
1067 magnetoencephalography system using optically pumped magnetometers. *Ann*  
1068 *N Y Acad Sci*.
- 1069 Riaz, B., Pfeiffer, C., Schneiderman, J.F., 2017. Evaluation of realistic layouts for next  
1070 generation on-scalp MEG: spatial information density maps. *Scientific Reports*  
1071 *7*, 6974.
- 1072 Roberts, G., Holmes, N., Alexander, N., Boto, E., Leggett, J., Hill, R.M., Shah, V., Rea,  
1073 M., Vaughan, R., Maguire, E.A., Kessler, K., Beebe, S., Fromhold, M., Barnes,  
1074 G.R., Bowtell, R., Brookes, M.J., 2019. Towards OPM-MEG in a virtual reality  
1075 environment. *NeuroImage* 199, 408-417.
- 1076 Rosenow, F., Luders, H., 2001. Presurgical evaluation of epilepsy. *Brain* 124, 1683-  
1077 1700.
- 1078 Ru, X., He, K., Lyu, B., Li, D., Xu, W., Gu, W., Ma, X., Liu, J., Li, C., Li, T., Zheng,  
1079 F., Yan, X., Yin, Y., Duan, H., Na, S., Wan, S., Qin, J., Sheng, J., Gao, J.H.,  
1080 2022. Multimodal neuroimaging with optically pumped magnetometers: A  
1081 simultaneous MEG-EEG-fNIRS acquisition system. *NeuroImage*, 119420.
- 1082 Sander, T.H., Preusser, J., Mhaskar, R., Kitching, J., Trahms, L., Knappe, S., 2012.  
1083 Magnetoencephalography with a chip-scale atomic magnetometer. *Biomed Opt*  
1084 *Express* 3, 981-990.
- 1085 Sekihara, K., Nagarajan, S.S., Poeppel, D., Marantz, A., 2004. Asymptotic SNR of  
1086 scalar and vector minimum-variance beamformers for neuromagnetic source  
1087 reconstruction. *IEEE Trans. Biomed. Eng* 51, 1726-1734.
- 1088 Seymour, R.A., Alexander, N., Mellor, S., O'Neill, G.C., Tierney, T.M., Barnes, G.R.,  
1089 Maguire, E.A., 2021. Using OPMs to measure neural activity in standing,  
1090 mobile participants. *NeuroImage* 244, 118604.
- 1091 Seymour, R.A., Alexander, N., Mellor, S., O'Neill, G.C., Tierney, T.M., Barnes, G.R.,  
1092 Maguire, E.A., 2022. Interference suppression techniques for OPM-based  
1093 MEG: Opportunities and challenges. *NeuroImage* 247, 118834.
- 1094 Shah, A.K., Mittal, S., 2014. Invasive electroencephalography monitoring: Indications  
1095 and presurgical planning. *Ann Indian Acad Neurol* 17, S89-94.
- 1096 Shah, V.K., Wakai, R.T., 2013. A compact, high performance atomic magnetometer for  
1097 biomedical applications. *Phys Med Biol* 58, 8153-8161.
- 1098 Stefan, H., Rampp, S., 2020. Interictal and Ictal MEG in presurgical evaluation for  
1099 epilepsy surgery. *Acta Epileptologica* 2, 11.
- 1100 Taulu, S., Kajola, M., Simola, J., 2004. Suppression of interference and artifacts by the  
1101 Signal Space Separation Method. *Brain Topogr* 16, 269-275.
- 1102 Taulu, S., Simola, J., 2006. Spatiotemporal signal space separation method for rejecting  
1103 nearby interference in MEG measurements. *Phys. Med. Biol* 51, 1759-1768.
- 1104 Taulu, S., Simola, J., Nenonen, J., Parkkonen, L., 2019. Novel Noise Reduction  
1105 Methods. In: Supek, S., Aine, C. (Eds.), *Magnetoencephalography: From*  
1106 *Signals Dynamics Cortical Networks*. Springer Cham, pp. 73-109.
- 1107 Tellez-Zenteno, J.F., Wiebe, S., 2008. Long-term seizure and psychosocial outcomes  
1108 of epilepsy surgery. *Curr. Treat. Options. Neurol* 10, 253-259.
- 1109 Tierney, T.M., Alexander, N., Mellor, S., Holmes, N., Seymour, R., O'Neill, G.C.,  
1110 Maguire, E.A., Barnes, G.R., 2021a. Modelling optically pumped  
1111 magnetometer interference in MEG as a spatially homogeneous magnetic field.  
1112 *NeuroImage* 244, 118484.

- 1113 Tierney, T.M., Holmes, N., Mellor, S., López, J.D., Roberts, G., Hill, R.M., Boto, E.,  
1114 Leggett, J., Shah, V., Brookes, M.J., Bowtell, R., Barnes, G.R., 2019. Optically  
1115 pumped magnetometers: From quantum origins to multi-channel  
1116 magnetoencephalography. *NeuroImage* 199, 598-608.
- 1117 Tierney, T.M., Holmes, N., Meyer, S.S., Boto, E., Roberts, G., Leggett, J., Buck, S.,  
1118 Duque-Munoz, L., Litvak, V., Bestmann, S., Baldeweg, T., Bowtell, R.,  
1119 Brookes, M.J., Barnes, G.R., 2018. Cognitive neuroscience using wearable  
1120 magnetometer arrays: Non-invasive assessment of language function.  
1121 *NeuroImage* 181, 513-520.
- 1122 Tierney, T.M., Levy, A., Barry, D.N., Meyer, S.S., Shigihara, Y., Everatt, M., Mellor,  
1123 S., Lopez, J.D., Bestmann, S., Holmes, N., Roberts, G., Hill, R.M., Boto, E.,  
1124 Leggett, J., Shah, V., Brookes, M.J., Bowtell, R., Maguire, E.A., Barnes, G.R.,  
1125 2021b. Mouth magnetoencephalography: A unique perspective on the human  
1126 hippocampus. *NeuroImage* 225, 117443.
- 1127 Tierney, T.M., Mellor, S., O'Neill, G.C., Timms, R.C., Barnes, G.R., 2022. Spherical  
1128 harmonic based noise rejection and neuronal sampling with multi-axis OPMs.  
1129 *NeuroImage* 258, 119338.
- 1130 van Klink, N., van Rosmalen, F., Nenonen, J., Burnos, S., Helle, L., Taulu, S., Furlong,  
1131 P.L., Zijlmans, M., Hillebrand, A., 2017. Automatic detection and visualisation  
1132 of MEG ripple oscillations in epilepsy. *Neuroimage Clin* 15, 689-701.
- 1133 Vivekananda, U., Mellor, S., Tierney, T.M., Holmes, N., Boto, E., Leggett, J., Roberts,  
1134 G., Hill, R.M., Litvak, V., Brookes, M.J., Bowtell, R., Barnes, G.R., Walker,  
1135 M.C., 2020. Optically pumped magnetoencephalography in epilepsy. *Ann Clin  
1136 Transl Neurol* 7, 397-401.
- 1137 Wens, V., 2022. Exploring the limits of MEG spatial resolution with multipolar  
1138 expansions. *arXiv:0711.1455, 2210.02863*.
- 1139 Zetter, R., Iivanainen, J., Parkkonen, L., 2019. Optical Co-registration of MRI and On-  
1140 scalp MEG. *Scientific Reports* 9, 5490.
- 1141 Zhang, R., Xiao, W., Ding, Y., Feng, Y., Peng, X., Shen, L., Sun, C., Wu, T., Wu, Y.,  
1142 Yang, Y., Zheng, Z., Zhang, X., Chen, J., Guo, H., 2020. Recording brain  
1143 activities in unshielded Earth's field with optically pumped atomic  
1144 magnetometers. *Sci Adv* 6, eaba8792.
